# Supplementary material for: RNAi screen reveals a role for PACSIN2 and caveolins during bacterial cell-to-cell spread
Source: bioRxiv or medRxiv preprint supplement (doi:10.1101/599795), 2019-04-04
Supplement: Supplementary file [file media-1.pdf]

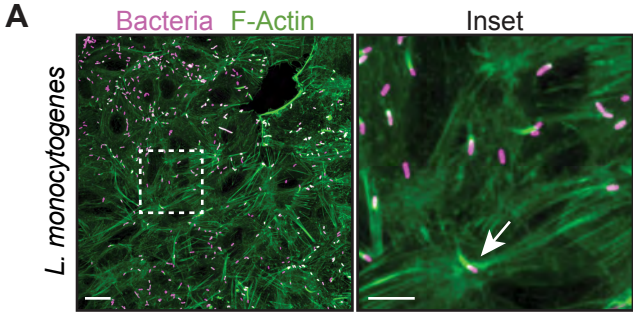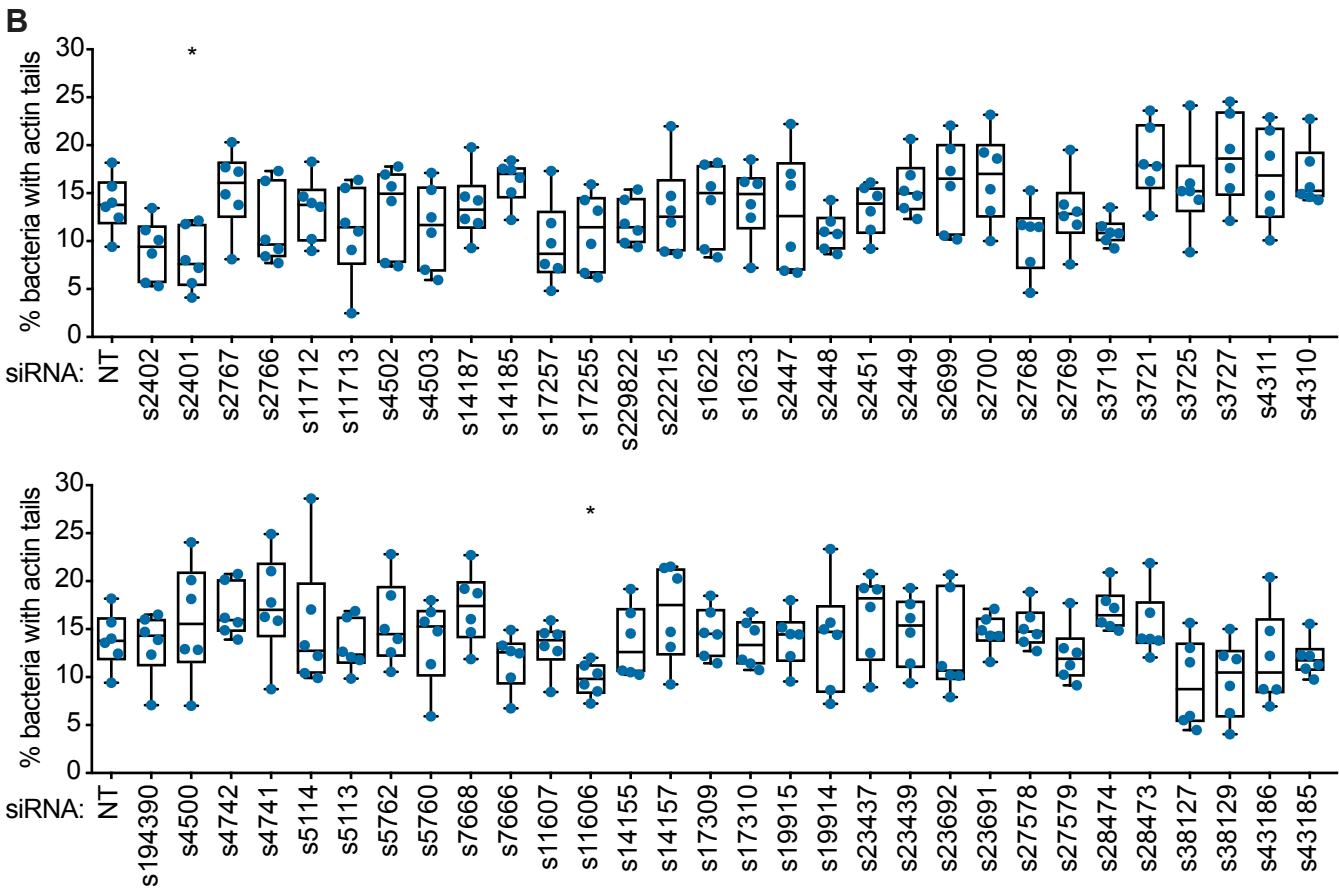

Fig S1

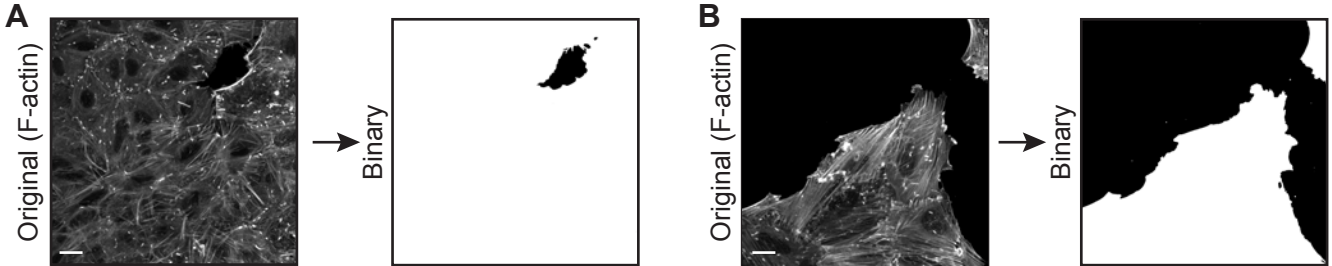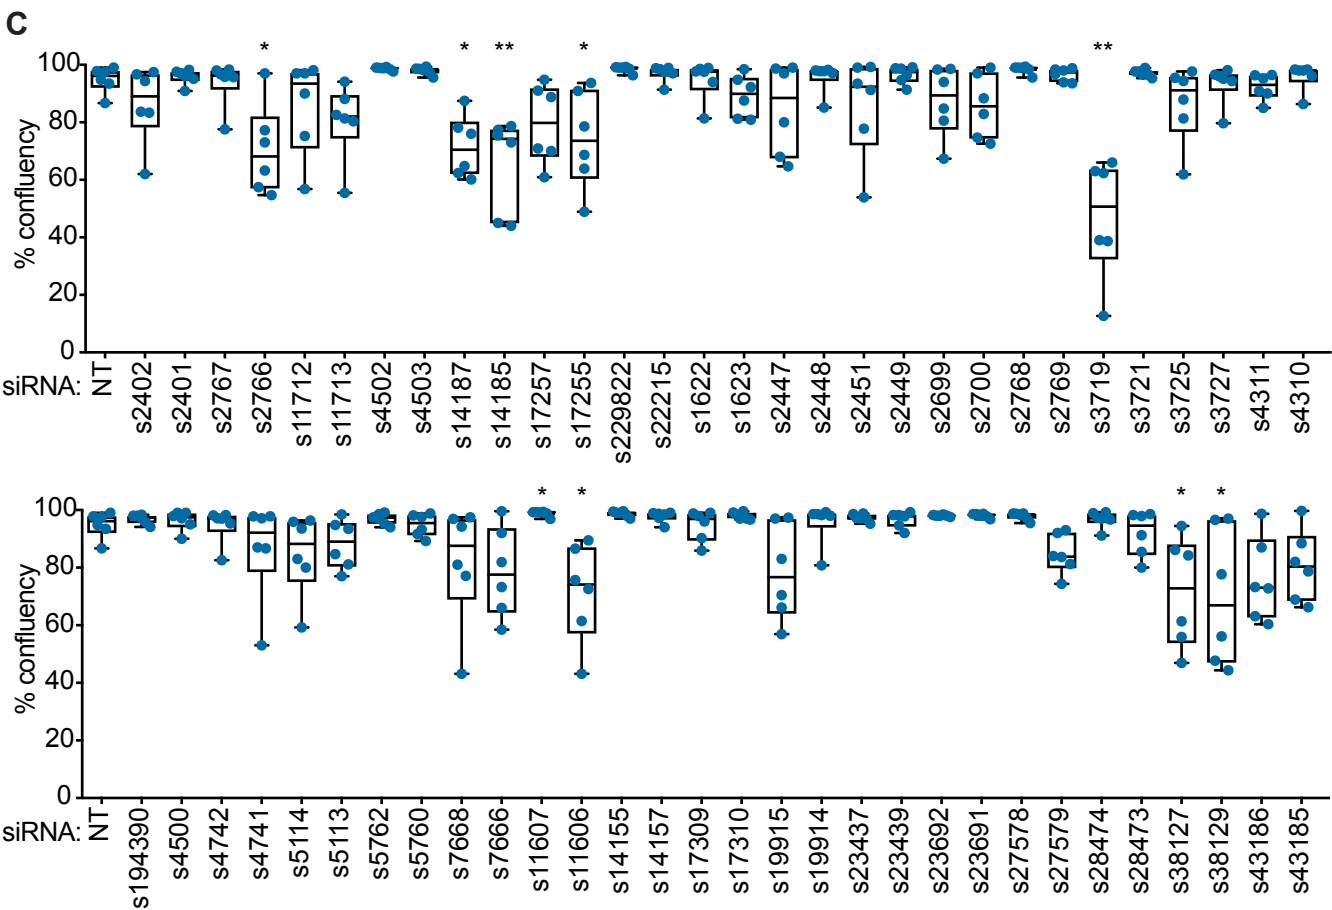

Fig S2

**Table S1: Primary siRNA screen results**

|                 |          |             | NT Avg:<br>11.34<br><i>Listeria A</i> | NT Avg:<br>12.2<br><i>Listeria B</i> | NT Avg:<br>83<br><i>Listeria A</i> | NT Avg:<br>85.7<br><i>Listeria B</i> |
|-----------------|----------|-------------|---------------------------------------|--------------------------------------|------------------------------------|--------------------------------------|
| increased 2+ SD |          |             |                                       |                                      |                                    |                                      |
| decreased 2+ SD |          |             |                                       |                                      |                                    |                                      |
| Entrez Gene ID  | siRNA ID | Gene Symbol | Avg Cluster Size                      | Avg Cluster Size                     | # Clusters/well                    | # Clusters/well                      |
| 10093           | s288550  | ARPC4       | 10.35                                 | 10.48                                | 57                                 | 65                                   |
| ArpC4           | s288549  | ARPC4       | 14.73                                 | 13.74                                | 125                                | 120                                  |
|                 | s288548  | ARPC4       | 8.90                                  | 9.06                                 | 67                                 | 67                                   |
|                 |          |             |                                       |                                      |                                    |                                      |
| 832             | s2403    | CAPZB       | 7.66                                  | 8.33                                 | 61                                 | 67                                   |
| CapzB           | s2402    | CAPZB       | 9.39                                  | 8.91                                 | 94                                 | 117                                  |
|                 | s2401    | CAPZB       | 9.55                                  | 9.51                                 | 109                                | 105                                  |
|                 |          |             |                                       |                                      |                                    |                                      |
| 163             | s38      | AP2B1       | 9.56                                  | 10.99                                | 91                                 | 86                                   |
| AP2B1           | s37      | AP2B1       | 9.91                                  | 11.91                                | 91                                 | 76                                   |
|                 | s36      | AP2B1       | 11.37                                 | 10.42                                | 82                                 | 84                                   |
|                 |          |             |                                       |                                      |                                    |                                      |
| 382             | s1567    | ARF6        | 11.46                                 | 11.16                                | 74                                 | 79                                   |
| ARF6            | s1565    | ARF6        | 10.04                                 | 10.68                                | 79                                 | 68                                   |
|                 | s223978  | ARF6        | 10.72                                 | 11.92                                | 72                                 | 77                                   |
|                 |          |             |                                       |                                      |                                    |                                      |
| 387             | s760     | RHOA        | 10.66                                 | 12.43                                | 76                                 | 83                                   |
| RhoA            | s759     | RHOA        | 9.70                                  | 10.79                                | 90                                 | 80                                   |
|                 | s758     | RHOA        | 8.36                                  | 8.80                                 | 44                                 | 50                                   |
|                 |          |             |                                       |                                      |                                    |                                      |
| 389             | s99      | RHOC        | 8.27                                  | 9.92                                 | 55                                 | 65                                   |
| RhoC            | s98      | RHOC        | 10.56                                 | 9.68                                 | 88                                 | 79                                   |
|                 | s97      | RHOC        | 9.92                                  | 10.77                                | 75                                 | 74                                   |
|                 |          |             |                                       |                                      |                                    |                                      |
| 408             | s1622    | ARRB1       | 5.65                                  | 8.83                                 | 65                                 | 63                                   |
| beta-arrestin 1 | s1624    | ARRB1       | 7.35                                  | 9.45                                 | 72                                 | 65                                   |
|                 | s1623    | ARRB1       | 6.76                                  | 6.27                                 | 42                                 | 51                                   |
|                 |          |             |                                       |                                      |                                    |                                      |
| 409             | s1627    | ARRB2       | 11.16                                 | 12.75                                | 31                                 | 48                                   |
| beta-arrestin2  | s1625    | ARRB2       | 9.39                                  | 10.19                                | 57                                 | 68                                   |
|                 | s1626    | ARRB2       | 11.74                                 | 11.32                                | 77                                 | 76                                   |
|                 |          |             |                                       |                                      |                                    |                                      |
| 857             | s2447    | CAV1        | 9.18                                  | 8.30                                 | 73                                 | 67                                   |
| Caveolin 1      | s2446    | CAV1        | 8.64                                  | 11.83                                | 78                                 | 48                                   |
|                 | s2448    | CAV1        | 9.30                                  | 7.80                                 | 67                                 | 97                                   |
|                 |          |             |                                       |                                      |                                    |                                      |
| 858             | s2451    | CAV2        | 7.87                                  | 8.25                                 | 103                                | 108                                  |
| Caveolin 2      | s2449    | CAV2        | 8.48                                  | 9.56                                 | 91                                 | 82                                   |
|                 | s2450    | CAV2        | 9.71                                  | 13.45                                | 80                                 | 56                                   |
|                 |          |             |                                       |                                      |                                    |                                      |
| 928             | s2598    | CD9         | 11.84                                 | 16.02                                | 80                                 | 63                                   |
| TSPAN-29        | s2597    | CD9         | 12.02                                 | 11.57                                | 89                                 | 82                                   |
|                 | s2599    | CD9         | 10.04                                 | 9.39                                 | 69                                 | 64                                   |
|                 |          |             |                                       |                                      |                                    |                                      |
| 960             | s284408  | CD44        | 8.69                                  | 10.60                                | 55                                 | 75                                   |
| CD44            | s307357  | CD44        | 11.80                                 | 10.16                                | 71                                 | 86                                   |
|                 | s284407  | CD44        | 11.27                                 | 12.66                                | 119                                | 112                                  |
|                 |          |             |                                       |                                      |                                    |                                      |
| 967             | s2699    | CD63        | 6.97                                  | 9.53                                 | 38                                 | 43                                   |
| Tspan30/CD63    | s2700    | CD63        | 8.77                                  | 9.01                                 | 78                                 | 81                                   |
|                 | s2701    | CD63        | 9.56                                  | 11.48                                | 61                                 | 69                                   |
|                 |          |             |                                       |                                      |                                    |                                      |
| 975             | s2723    | CD81        | 8.89                                  | 10.48                                | 83                                 | 82                                   |
| Tsapn-28/CD81   | s2722    | CD81        | 11.07                                 | 12.20                                | 87                                 | 80                                   |
|                 | s2724    | CD81        | 8.84                                  | 10.37                                | 50                                 | 59                                   |
|                 |          |             |                                       |                                      |                                    |                                      |
| 977             | s194332  | CD151       | 7.74                                  | 8.04                                 | 42                                 | 57                                   |
| TSPAN-24        | s194333  | CD151       | 11.79                                 | 13.24                                | 96                                 | 84                                   |
|                 | s2728    | CD151       | 12.04                                 | 12.67                                | 83                                 | 69                                   |
|                 |          |             |                                       |                                      |                                    |                                      |

|                                    |          | NT Avg:<br>11.34<br><i>Listeria A</i> |                  | NT Avg:<br>12.2<br><i>Listeria B</i> |                 | NT Avg:<br>83<br><i>Listeria A</i> |  | NT Avg:<br>85.7<br><i>Listeria B</i> |  |
|------------------------------------|----------|---------------------------------------|------------------|--------------------------------------|-----------------|------------------------------------|--|--------------------------------------|--|
| increased 2+ SD<br>decreased 2+ SD |          |                                       |                  |                                      |                 |                                    |  |                                      |  |
| Entrez Gene ID                     | siRNA ID | Gene Symbol                           | Avg Cluster Size | Avg Cluster Size                     | # Clusters/well | # Clusters/well                    |  |                                      |  |
| 998                                | s2767    | CDC42                                 | 6.97             | 6.69                                 | 93              | 96                                 |  |                                      |  |
| Cdc42                              | s2766    | CDC42                                 | 4.05             | 7.17                                 | 41              | 52                                 |  |                                      |  |
|                                    | s2765    | CDC42                                 | 8.72             | 10.53                                | 93              | 94                                 |  |                                      |  |
| 999                                | s2768    | CDH1                                  | 9.50             | 4.67                                 | 6               | 21                                 |  |                                      |  |
| E-cadherin                         | s2769    | CDH1                                  | 7.00             | 6.07                                 | 11              | 42                                 |  |                                      |  |
|                                    | s2770    | CDH1                                  | 9.11             | 7.52                                 | 35              | 63                                 |  |                                      |  |
| 1000                               | s2772    | CDH2                                  | 8.31             | 17.09                                | 55              | 67                                 |  |                                      |  |
| N-cadherin, type 1                 | s2773    | CDH2                                  | 10.91            | 10.16                                | 95              | 112                                |  |                                      |  |
|                                    | s2771    | CDH2                                  | 8.07             | 10.40                                | 102             | 96                                 |  |                                      |  |
| 1173                               | s3114    | AP2M1                                 | 8.21             | 9.57                                 | 107             | 81                                 |  |                                      |  |
| AP2-u2                             | s3112    | AP2M1                                 | 9.75             | 11.04                                | 84              | 93                                 |  |                                      |  |
|                                    | s3113    | AP2M1                                 | 13.03            | 14.54                                | 120             | 98                                 |  |                                      |  |
| 1213                               | s477     | CLTC                                  | 9.11             | 10.64                                | 120             | 95                                 |  |                                      |  |
| Clathrin Heavy Chn                 | s476     | CLTC                                  | 11.67            | 13.67                                | 108             | 95                                 |  |                                      |  |
|                                    | s475     | CLTC                                  | 13.22            | 14.94                                | 114             | 95                                 |  |                                      |  |
| 1495                               | s3716    | CTNNA1                                | 7.23             | 10.65                                | 78              | 63                                 |  |                                      |  |
| alpha-catenin 1                    | s3717    | CTNNA1                                | 7.84             | 7.64                                 | 86              | 114                                |  |                                      |  |
|                                    | s3718    | CTNNA1                                | 9.38             | 13.50                                | 102             | 74                                 |  |                                      |  |
| 1496                               | s3719    | CTNNA2                                | 6.05             | 6.74                                 | 38              | 50                                 |  |                                      |  |
| alpha-catenin 2                    | s3721    | CTNNA2                                | 9.48             | 10.24                                | 95              | 83                                 |  |                                      |  |
|                                    | s3720    | CTNNA2                                | 12.34            | 12.80                                | 67              | 80                                 |  |                                      |  |
| 1499                               | s438     | CTNNB1                                | 11.09            | 9.18                                 | 45              | 66                                 |  |                                      |  |
| beta-catenin                       | s437     | CTNNB1                                | 11.73            | 10.81                                | 60              | 72                                 |  |                                      |  |
|                                    | s436     | CTNNB1                                | 7.66             | 7.48                                 | 59              | 63                                 |  |                                      |  |
| 1500                               | s3726    | CTNND1                                | 10.43            | 11.68                                | 79              | 72                                 |  |                                      |  |
| p120 catenin                       | s3725    | CTNND1                                | 4.95             | 6.50                                 | 115             | 103                                |  |                                      |  |
|                                    | s3727    | CTNND1                                | 6.18             | 8.72                                 | 40              | 60                                 |  |                                      |  |
| 1785                               | s285562  | DNM2                                  | 11.46            | 10.28                                | 95              | 96                                 |  |                                      |  |
| dynammin-2                         | s285561  | DNM2                                  | 11.86            | 11.16                                | 91              | 99                                 |  |                                      |  |
|                                    | s285560  | DNM2                                  | 9.55             | 12.15                                | 74              | 89                                 |  |                                      |  |
| 1824                               | s4311    | DSC2                                  | 6.27             | 8.39                                 | 75              | 88                                 |  |                                      |  |
| desmocollin-2                      | s4309    | DSC2                                  | 10.81            | 11.55                                | 75              | 95                                 |  |                                      |  |
|                                    | s4310    | DSC2                                  | 8.49             | 9.86                                 | 81              | 97                                 |  |                                      |  |
| 1825                               | s4312    | DSC3                                  | 9.41             | 11.23                                | 75              | 99                                 |  |                                      |  |
| desmocollin-3                      | s4313    | DSC3                                  | 12.39            | 13.46                                | 74              | 81                                 |  |                                      |  |
|                                    | s4314    | DSC3                                  | 13.88            | 12.82                                | 77              | 76                                 |  |                                      |  |
| 1828                               | s4321    | DSG1                                  | 12.26            | 12.75                                | 93              | 99                                 |  |                                      |  |
| desmoglein-1                       | s4323    | DSG1                                  | 9.92             | 12.68                                | 71              | 74                                 |  |                                      |  |
|                                    | s4322    | DSG1                                  | 10.32            | 9.98                                 | 95              | 90                                 |  |                                      |  |
| 1829                               | s4326    | DSG2                                  | 9.56             | 11.30                                | 109             | 97                                 |  |                                      |  |
| desmoglein-2                       | s4324    | DSG2                                  | 9.91             | 13.15                                | 91              | 82                                 |  |                                      |  |
|                                    | s4325    | DSG2                                  | 9.96             | 11.48                                | 89              | 92                                 |  |                                      |  |
| 1832                               | s4335    | DSP                                   | 9.02             | 10.87                                | 60              | 63                                 |  |                                      |  |
| Desmoplakin                        | s4334    | DSP                                   | 9.07             | 10.28                                | 88              | 87                                 |  |                                      |  |
|                                    | s4333    | DSP                                   | 12.85            | 10.41                                | 97              | 95                                 |  |                                      |  |
| 1943                               | s194390  | EFNA2                                 | 9.13             | 10.20                                | 76              | 75                                 |  |                                      |  |

|                          |          | NT Avg:<br>11.34<br><i>Listeria A</i> |                  | NT Avg:<br>12.2<br><i>Listeria B</i> |                 | NT Avg:<br>83<br><i>Listeria A</i> |  | NT Avg:<br>85.7<br><i>Listeria B</i> |  |
|--------------------------|----------|---------------------------------------|------------------|--------------------------------------|-----------------|------------------------------------|--|--------------------------------------|--|
|                          |          | increased 2+ SD                       |                  | decreased 2+ SD                      |                 |                                    |  |                                      |  |
| Entrez Gene ID           | siRNA ID | Gene Symbol                           | Avg Cluster Size | Avg Cluster Size                     | # Clusters/well | # Clusters/well                    |  |                                      |  |
| Ephrin-A2                | s223469  | EFNA2                                 | 8.76             | 11.35                                | 114             | 97                                 |  |                                      |  |
|                          | s4500    | EFNA2                                 | 8.01             | 9.41                                 | 73              | 92                                 |  |                                      |  |
| 1944                     | s4501    | EFNA3                                 | 10.26            | 11.01                                | 89              | 107                                |  |                                      |  |
| Ephrin-A3                | s4502    | EFNA3                                 | 7.68             | 7.48                                 | 72              | 84                                 |  |                                      |  |
|                          | s4503    | EFNA3                                 | 8.04             | 7.80                                 | 69              | 88                                 |  |                                      |  |
| 1945                     | s371795  | EFNA4                                 | 10.98            | 13.06                                | 101             | 97                                 |  |                                      |  |
| Ephrin-A4                | s371794  | EFNA4                                 | 10.07            | 11.68                                | 73              | 76                                 |  |                                      |  |
|                          | s371793  | EFNA4                                 | 10.84            | 11.02                                | 107             | 91                                 |  |                                      |  |
| 1946                     | s4508    | EFNA5                                 | 8.46             | 8.49                                 | 87              | 92                                 |  |                                      |  |
| Ephrin-A5                | s4507    | EFNA5                                 | 11.01            | 11.33                                | 93              | 96                                 |  |                                      |  |
|                          | s4509    | EFNA5                                 | 14.11            | 14.34                                | 53              | 50                                 |  |                                      |  |
| 1947                     | s4511    | EFNB1                                 | 7.40             | 9.89                                 | 45              | 63                                 |  |                                      |  |
| Ephrin-B1                | s4510    | EFNB1                                 | 10.68            | 9.63                                 | 81              | 92                                 |  |                                      |  |
|                          | s4512    | EFNB1                                 | 11.59            | 11.26                                | 74              | 95                                 |  |                                      |  |
| 1948                     | s4515    | EFNB2                                 | 8.91             | 9.42                                 | 96              | 69                                 |  |                                      |  |
| Ephrin-B2                | s4513    | EFNB2                                 | 10.51            | 10.58                                | 87              | 101                                |  |                                      |  |
|                          | s4514    | EFNB2                                 | 10.22            | 11.83                                | 92              | 80                                 |  |                                      |  |
| 1969                     | s4564    | EPHA2                                 | 9.18             | 11.57                                | 45              | 67                                 |  |                                      |  |
| Ephrin type A receptor 2 | s4566    | EPHA2                                 | 10.62            | 11.98                                | 78              | 82                                 |  |                                      |  |
|                          | s4565    | EPHA2                                 | 12.41            | 9.90                                 | 74              | 87                                 |  |                                      |  |
| 2017                     | s345349  | CTTN                                  | 10.37            | 10.26                                | 63              | 85                                 |  |                                      |  |
| cortactin                | s345348  | CTTN                                  | 13.29            | 11.92                                | 82              | 95                                 |  |                                      |  |
|                          | s345347  | CTTN                                  | 11.92            | 10.57                                | 83              | 89                                 |  |                                      |  |
| 2041                     | s4721    | EPHA1                                 | 8.80             | 10.88                                | 107             | 80                                 |  |                                      |  |
| Ephrin type A receptor 1 | s4719    | EPHA1                                 | 9.99             | 11.84                                | 77              | 91                                 |  |                                      |  |
|                          | s223490  | EPHA1                                 | 10.37            | 11.73                                | 105             | 107                                |  |                                      |  |
| 2042                     | s4724    | EPHA3                                 | 9.17             | 12.47                                | 82              | 91                                 |  |                                      |  |
| Ephrin type A receptor 3 | s4722    | EPHA3                                 | 10.76            | 10.24                                | 88              | 90                                 |  |                                      |  |
|                          | s4723    | EPHA3                                 | 8.99             | 10.55                                | 91              | 85                                 |  |                                      |  |
| 2045                     | s4733    | EPHA7                                 | 8.92             | 11.69                                | 48              | 95                                 |  |                                      |  |
| Ephrin type A receptor 7 | s4731    | EPHA7                                 | 8.41             | 10.49                                | 76              | 81                                 |  |                                      |  |
|                          | s4732    | EPHA7                                 | 5.28             | 6.29                                 | 47              | 68                                 |  |                                      |  |
| 2046                     | s4736    | EPHA8                                 | 9.13             | 10.72                                | 79              | 92                                 |  |                                      |  |
| Ephrin type A receptor 8 | s4735    | EPHA8                                 | 11.22            | 12.46                                | 82              | 100                                |  |                                      |  |
|                          | s223498  | EPHA8                                 | 9.38             | 8.53                                 | 80              | 75                                 |  |                                      |  |
| 2048                     | s4742    | EPHB2                                 | 6.97             | 7.76                                 | 76              | 71                                 |  |                                      |  |
| Ephrin type B receptor 2 | s4741    | EPHB2                                 | 8.80             | 10.31                                | 82              | 80                                 |  |                                      |  |
|                          | s4740    | EPHB2                                 | 12.10            | 13.63                                | 98              | 80                                 |  |                                      |  |
| 2049                     | s4743    | EPHB3                                 | 11.39            | 11.56                                | 70              | 80                                 |  |                                      |  |
| Ephrin type B receptor 3 | s4745    | EPHB3                                 | 11.77            | 12.18                                | 82              | 85                                 |  |                                      |  |
|                          | s4744    | EPHB3                                 | 10.69            | 11.25                                | 104             | 102                                |  |                                      |  |
| 2241                     | s5110    | FER                                   | 9.67             | 10.14                                | 92              | 84                                 |  |                                      |  |
| Fer (F-bar)              | s5111    | FER                                   | 10.76            | 11.51                                | 100             | 90                                 |  |                                      |  |
|                          | s5109    | FER                                   | 10.46            | 10.31                                | 48              | 74                                 |  |                                      |  |
| 2242                     | s5114    | FES                                   | 7.64             | 9.78                                 | 97              | 77                                 |  |                                      |  |
| Fes (F-bar)              | s5113    | FES                                   | 8.13             | 9.36                                 | 100             | 90                                 |  |                                      |  |

|                 |          | NT Avg:<br>11.34<br><i>Listeria A</i> |                  | NT Avg:<br>12.2<br><i>Listeria B</i> |                 | NT Avg:<br>83<br><i>Listeria A</i> |  | NT Avg:<br>85.7<br><i>Listeria B</i> |  |
|-----------------|----------|---------------------------------------|------------------|--------------------------------------|-----------------|------------------------------------|--|--------------------------------------|--|
| increased 2+ SD |          |                                       |                  |                                      |                 |                                    |  |                                      |  |
| decreased 2+ SD |          |                                       |                  |                                      |                 |                                    |  |                                      |  |
| Entrez Gene ID  | siRNA ID | Gene Symbol                           | Avg Cluster Size | Avg Cluster Size                     | # Clusters/well | # Clusters/well                    |  |                                      |  |
|                 | s5112    | FES                                   | 10.31            | 14.08                                | 91              | 91                                 |  |                                      |  |
| 2319            | s5285    | FLOT2                                 | 10.92            | 12.39                                | 97              | 93                                 |  |                                      |  |
| Flotillin 2     | s5286    | FLOT2                                 | 12.09            | 12.06                                | 90              | 96                                 |  |                                      |  |
|                 | s5284    | FLOT2                                 | 7.95             | 10.04                                | 96              | 96                                 |  |                                      |  |
| 2697            | s5757    | GJA1                                  | 9.27             | 12.73                                | 98              | 93                                 |  |                                      |  |
| Connexin 43     | s5758    | GJA1                                  | 9.87             | 10.52                                | 92              | 95                                 |  |                                      |  |
|                 | s5759    | GJA1                                  | 11.57            | 13.47                                | 84              | 114                                |  |                                      |  |
| 2700            | s5761    | GJA3                                  | 9.32             | 10.16                                | 77              | 89                                 |  |                                      |  |
| Connexin 46     | s5762    | GJA3                                  | 9.52             | 10.33                                | 87              | 103                                |  |                                      |  |
|                 | s5760    | GJA3                                  | 8.95             | 10.02                                | 61              | 83                                 |  |                                      |  |
| 2701            | s5763    | GJA4                                  | 8.71             | 9.36                                 | 78              | 87                                 |  |                                      |  |
| Connexin 37     | s5765    | GJA4                                  | 8.89             | 10.75                                | 96              | 91                                 |  |                                      |  |
|                 | s5764    | GJA4                                  | 10.88            | 14.08                                | 73              | 75                                 |  |                                      |  |
| 2702            | s5767    | GJA5                                  | 10.41            | 9.23                                 | 85              | 79                                 |  |                                      |  |
| Connexin 40     | s5768    | GJA5                                  | 10.01            | 10.08                                | 94              | 87                                 |  |                                      |  |
|                 | s5766    | GJA5                                  | 11.26            | 11.20                                | 90              | 101                                |  |                                      |  |
| 2706            | s5775    | GJB2                                  | 13.13            | 12.49                                | 90              | 102                                |  |                                      |  |
| Connexin 26     | s5777    | GJB2                                  | 9.75             | 8.85                                 | 79              | 74                                 |  |                                      |  |
|                 | s5776    | GJB2                                  | 13.88            | 12.34                                | 94              | 116                                |  |                                      |  |
| 2707            | s5779    | GJB3                                  | 11.03            | 9.68                                 | 90              | 111                                |  |                                      |  |
| Connexin 31     | s5778    | GJB3                                  | 12.38            | 9.22                                 | 90              | 100                                |  |                                      |  |
|                 | s5780    | GJB3                                  | 9.20             | 9.17                                 | 56              | 72                                 |  |                                      |  |
| 2709            | s5783    | GJB5                                  | 11.12            | 10.63                                | 106             | 115                                |  |                                      |  |
| Connexin 31.3   | s223727  | GJB5                                  | 9.77             | 12.46                                | 79              | 98                                 |  |                                      |  |
|                 | s5782    | GJB5                                  | 9.88             | 10.89                                | 94              | 101                                |  |                                      |  |
| 3383            | s7087    | ICAM1                                 | 9.81             | 10.56                                | 88              | 71                                 |  |                                      |  |
| ICAM1           | s7088    | ICAM1                                 | 10.20            | 11.83                                | 98              | 103                                |  |                                      |  |
|                 | s7086    | ICAM1                                 | 7.68             | 8.66                                 | 37              | 59                                 |  |                                      |  |
| 3728            | s7668    | JUP                                   | 8.67             | 9.16                                 | 95              | 119                                |  |                                      |  |
| gamma-catenin   | s7666    | JUP                                   | 7.44             | 9.99                                 | 59              | 72                                 |  |                                      |  |
|                 | s7667    | JUP                                   | 11.56            | 10.75                                | 86              | 113                                |  |                                      |  |
| 4478            | s8985    | MSN                                   | 7.08             | 10.65                                | 59              | 74                                 |  |                                      |  |
| Moesin          | s8984    | MSN                                   | 10.66            | 13.86                                | 93              | 95                                 |  |                                      |  |
|                 | s8986    | MSN                                   | 7.78             | 10.03                                | 69              | 77                                 |  |                                      |  |
| 5110            | s10130   | PCMT1                                 | 10.23            | 13.83                                | 80              | 84                                 |  |                                      |  |
| Endophilin-B1   | s10132   | PCMT1                                 | 10.47            | 12.14                                | 108             | 95                                 |  |                                      |  |
|                 | s10131   | PCMT1                                 | 9.62             | 10.47                                | 61              | 85                                 |  |                                      |  |
| 5819            | s11607   | PVRL2                                 | 9.24             | 9.63                                 | 91              | 95                                 |  |                                      |  |
| Nectin 2        | s11606   | PVRL2                                 | 7.24             | 10.10                                | 58              | 60                                 |  |                                      |  |
|                 | s11608   | PVRL2                                 | 9.99             | 11.26                                | 87              | 72                                 |  |                                      |  |
| 5868            | s11678   | RAB5A                                 | 11.59            | 11.92                                | 80              | 77                                 |  |                                      |  |
| Rab5a           | s11680   | RAB5A                                 | 11.43            | 12.95                                | 69              | 77                                 |  |                                      |  |
|                 | s11679   | RAB5A                                 | 12.89            | 9.28                                 | 74              | 76                                 |  |                                      |  |
| 5879            | s11712   | RAC1                                  | 6.24             | 7.97                                 | 45              | 86                                 |  |                                      |  |
| Rac1            | s11711   | RAC1                                  | 4.27             | 3.96                                 | 52              | 55                                 |  |                                      |  |
|                 | s11713   | RAC1                                  | 5.15             | 7.38                                 | 67              | 64                                 |  |                                      |  |

|                  |          |                |       | NT Avg:<br>11.34<br><i>Listeria A</i> | NT Avg:<br>12.2<br><i>Listeria B</i> | NT Avg:<br>83<br><i>Listeria A</i> | NT Avg:<br>85.7<br><i>Listeria B</i> |
|------------------|----------|----------------|-------|---------------------------------------|--------------------------------------|------------------------------------|--------------------------------------|
|                  |          |                |       | Avg Cluster<br>Size                   | Avg Cluster<br>Size                  | #<br>Clusters/well                 | #<br>Clusters/well                   |
| Entrez Gene ID   | siRNA ID | Gene<br>Symbol |       |                                       |                                      |                                    |                                      |
| 5962             | s11899   | RDX            | 9.45  | 10.10                                 | 86                                   | 102                                |                                      |
| Radixin          | s11900   | RDX            | 11.11 | 11.41                                 | 85                                   | 98                                 |                                      |
|                  | s11901   | RDX            | 9.77  | 12.42                                 | 52                                   | 83                                 |                                      |
|                  |          |                |       |                                       |                                      |                                    |                                      |
| 6455             | s12796   | SH3GL1         | 11.32 | 12.44                                 | 93                                   | 91                                 |                                      |
| Endophilin-A2    | s12797   | SH3GL1         | 8.92  | 11.48                                 | 91                                   | 75                                 |                                      |
|                  | s12798   | SH3GL1         | 10.25 | 10.96                                 | 106                                  | 100                                |                                      |
| 7082             | s14155   | TJP1           | 9.33  | 9.86                                  | 75                                   | 98                                 |                                      |
| ZO-1             | s14156   | TJP1           | 12.66 | 10.87                                 | 82                                   | 99                                 |                                      |
|                  | s14157   | TJP1           | 9.28  | 10.37                                 | 82                                   | 84                                 |                                      |
| 7094             | s14187   | TLN1           | 7.73  | 10.85                                 | 110                                  | 122                                |                                      |
| Talin 1          | s14186   | TLN1           | 5.07  | 8.18                                  | 91                                   | 110                                |                                      |
|                  | s14185   | TLN1           | 9.58  | 9.55                                  | 113                                  | 121                                |                                      |
| 7106             | s14216   | TSPAN4         | 10.11 | 11.98                                 | 96                                   | 80                                 |                                      |
| TSPAN-4/NAG-2    | s14215   | TSPAN4         | 12.30 | 11.51                                 | 89                                   | 93                                 |                                      |
|                  | s14217   | TSPAN4         | 9.74  | 8.86                                  | 39                                   | 73                                 |                                      |
| 7251             | s14439   | TSG101         | 11.04 | 14.11                                 | 94                                   | 72                                 |                                      |
| Tsg101 (ESCRT-I) | s14440   | TSG101         | 9.27  | 10.77                                 | 84                                   | 87                                 |                                      |
|                  | s14441   | TSG101         | 9.83  | 9.42                                  | 70                                   | 88                                 |                                      |
| 7412             | s14759   | VCAM1          | 10.99 | 10.35                                 | 82                                   | 68                                 |                                      |
| VCAM-1           | s14761   | VCAM1          | 11.83 | 12.65                                 | 95                                   | 97                                 |                                      |
|                  | s14760   | VCAM1          | 10.26 | 11.03                                 | 98                                   | 93                                 |                                      |
| 7414             | s14762   | VCL            | 9.12  | 10.14                                 | 85                                   | 91                                 |                                      |
| Vinculin         | s14763   | VCL            | 10.83 | 11.79                                 | 88                                   | 103                                |                                      |
|                  | s14764   | VCL            | 11.55 | 12.37                                 | 91                                   | 90                                 |                                      |
| 7430             | s14796   | EZR            | 11.38 | 12.09                                 | 98                                   | 96                                 |                                      |
| Ezrin            | s14795   | EZR            | 10.92 | 10.81                                 | 95                                   | 101                                |                                      |
|                  | s14797   | EZR            | 9.96  | 11.91                                 | 104                                  | 94                                 |                                      |
| 8436             | s16008   | SDPR           | 10.30 | 9.40                                  | 89                                   | 105                                |                                      |
| Cavin-2          | s16006   | SDPR           | 10.06 | 9.52                                  | 66                                   | 94                                 |                                      |
|                  | s16007   | SDPR           | 10.90 | 10.67                                 | 94                                   | 93                                 |                                      |
| 8522             | s16201   | GAS7           | 9.15  | 8.69                                  | 81                                   | 85                                 |                                      |
| GSA7 (F-bar)     | s16202   | GAS7           | 9.27  | 11.48                                 | 74                                   | 63                                 |                                      |
|                  | s16200   | GAS7           | 10.18 | 9.20                                  | 89                                   | 90                                 |                                      |
| 8976             | s17134   | WASL           | 11.42 | 12.10                                 | 113                                  | 111                                |                                      |
| N-WASP           | s17133   | WASL           | 8.35  | 10.94                                 | 113                                  | 95                                 |                                      |
|                  | s17132   | WASL           | 7.07  | 11.39                                 | 75                                   | 74                                 |                                      |
| 9050             | s17253   | PSTPIP2        | 10.07 | 10.75                                 | 71                                   | 72                                 |                                      |
| PSTPIP2          | s17254   | PSTPIP2        | 12.99 | 14.48                                 | 73                                   | 97                                 |                                      |
|                  | s17252   | PSTPIP2        | 11.68 | 12.78                                 | 104                                  | 91                                 |                                      |
| 9051             | s17257   | PSTPIP1        | 8.64  | 8.04                                  | 69                                   | 74                                 |                                      |
| PSTPIP1 (F-bar)  | s17255   | PSTPIP1        | 6.20  | 7.64                                  | 45                                   | 53                                 |                                      |
|                  | s17256   | PSTPIP1        | 9.87  | 10.79                                 | 124                                  | 99                                 |                                      |
| 9069             | s17298   | CLDN12         | 9.02  | 10.52                                 | 83                                   | 89                                 |                                      |
| Claudin-12       | s17297   | CLDN12         | 11.04 | 10.81                                 | 91                                   | 75                                 |                                      |
|                  | s17299   | CLDN12         | 10.97 | 9.87                                  | 64                                   | 90                                 |                                      |
| 9074             | s17309   | CLDN6          | 8.66  | 9.41                                  | 79                                   | 83                                 |                                      |

|                   |          | NT Avg:<br>11.34<br><i>Listeria A</i> |                  | NT Avg:<br>12.2<br><i>Listeria B</i> |                 | NT Avg:<br>83<br><i>Listeria A</i> |  | NT Avg:<br>85.7<br><i>Listeria B</i> |  |
|-------------------|----------|---------------------------------------|------------------|--------------------------------------|-----------------|------------------------------------|--|--------------------------------------|--|
| increased 2+ SD   |          |                                       |                  |                                      |                 |                                    |  |                                      |  |
| decreased 2+ SD   |          |                                       |                  |                                      |                 |                                    |  |                                      |  |
| Entrez Gene ID    | siRNA ID | Gene Symbol                           | Avg Cluster Size | Avg Cluster Size                     | # Clusters/well | # Clusters/well                    |  |                                      |  |
| Claudin-6         | s17311   | CLDN6                                 | 11.15            | 13.48                                | 87              | 84                                 |  |                                      |  |
|                   | s17310   | CLDN6                                 | 10.07            | 8.93                                 | 96              | 98                                 |  |                                      |  |
| 9075              | s17314   | CLDN2                                 | 7.72             | 11.25                                | 106             | 107                                |  |                                      |  |
| Claudin-2         | s17312   | CLDN2                                 | 8.31             | 10.45                                | 83              | 99                                 |  |                                      |  |
|                   | s225076  | CLDN2                                 | 8.66             | 9.21                                 | 71              | 73                                 |  |                                      |  |
| 9076              | s17316   | CLDN1                                 | 10.50            | 11.92                                | 86              | 98                                 |  |                                      |  |
| Claudin-1         | s17317   | CLDN1                                 | 10.49            | 10.66                                | 103             | 97                                 |  |                                      |  |
|                   | s17315   | CLDN1                                 | 8.49             | 11.04                                | 94              | 113                                |  |                                      |  |
| 9080              | s194981  | CLDN9                                 | 10.78            | 11.73                                | 92              | 92                                 |  |                                      |  |
| Claudin-9         | s194980  | CLDN9                                 | 9.90             | 13.36                                | 78              | 66                                 |  |                                      |  |
|                   | s194979  | CLDN9                                 | 9.03             | 10.94                                | 73              | 78                                 |  |                                      |  |
| 9146              | s17480   | HGS                                   | 9.73             | 10.37                                | 71              | 83                                 |  |                                      |  |
| Hrs               | s17481   | HGS                                   | 9.68             | 11.43                                | 59              | 92                                 |  |                                      |  |
|                   | s17482   | HGS                                   | 10.26            | 11.08                                | 87              | 83                                 |  |                                      |  |
| 9322              | s17816   | TRIP10                                | 9.25             | 12.31                                | 91              | 86                                 |  |                                      |  |
| CIP4              | s17815   | TRIP10                                | 11.12            | 10.57                                | 85              | 93                                 |  |                                      |  |
|                   | s17814   | TRIP10                                | 12.78            | 11.09                                | 94              | 99                                 |  |                                      |  |
| 9525              | s18274   | VPS4B                                 | 10.91            | 14.45                                | 91              | 98                                 |  |                                      |  |
| SKD1              | s18273   | VPS4B                                 | 8.02             | 9.85                                 | 109             | 102                                |  |                                      |  |
|                   | s18272   | VPS4B                                 | 12.56            | 11.38                                | 100             | 104                                |  |                                      |  |
| 9788              | s18916   | MTSS1                                 | 9.71             | 12.31                                | 87              | 91                                 |  |                                      |  |
| MIM               | s18917   | MTSS1                                 | 11.14            | 11.06                                | 88              | 107                                |  |                                      |  |
|                   | s18915   | MTSS1                                 | 8.79             | 10.08                                | 73              | 79                                 |  |                                      |  |
| 10052             | s19541   | GJC1                                  | 10.43            | 9.82                                 | 101             | 104                                |  |                                      |  |
| Connexin-45       | s19543   | GJC1                                  | 9.69             | 11.10                                | 74              | 88                                 |  |                                      |  |
|                   | s223072  | GJC1                                  | 5.03             | 8.48                                 | 79              | 85                                 |  |                                      |  |
| 10211             | s19915   | FLOT1                                 | 6.71             | 9.48                                 | 78              | 79                                 |  |                                      |  |
| Flotillin 1       | s19914   | FLOT1                                 | 8.67             | 7.75                                 | 51              | 97                                 |  |                                      |  |
|                   | s19913   | FLOT1                                 | 8.57             | 10.48                                | 72              | 93                                 |  |                                      |  |
| 10458             | s20464   | BAIAP2                                | 8.23             | 10.77                                | 92              | 93                                 |  |                                      |  |
| IRSp53 (I-bar)    | s20465   | BAIAP2                                | 10.00            | 13.23                                | 73              | 75                                 |  |                                      |  |
|                   | s20463   | BAIAP2                                | 9.93             | 8.66                                 | 73              | 102                                |  |                                      |  |
| 10804             | s21231   | GJB6                                  | 9.06             | 10.12                                | 100             | 86                                 |  |                                      |  |
| Connexin 30       | s21232   | GJB6                                  | 11.37            | 12.49                                | 82              | 98                                 |  |                                      |  |
|                   | s21233   | GJB6                                  | 11.62            | 11.86                                | 74              | 81                                 |  |                                      |  |
| 11252             | s229822  | PACSIN2                               | 10.11            | 9.39                                 | 90              | 76                                 |  |                                      |  |
| Pacsin2 (F-bar)   | s22216   | PACSIN2                               | 11.15            | 9.92                                 | 88              | 88                                 |  |                                      |  |
|                   | s22215   | PACSIN2                               | 6.23             | 9.89                                 | 43              | 64                                 |  |                                      |  |
| 11267             | s22248   | SNF8                                  | 9.79             | 10.91                                | 107             | 92                                 |  |                                      |  |
| EAP30 (Escrt-II)  | s22247   | SNF8                                  | 10.05            | 9.32                                 | 96              | 92                                 |  |                                      |  |
|                   | s22249   | SNF8                                  | 12.51            | 14.33                                | 110             | 99                                 |  |                                      |  |
| 23048             | s22914   | FNBP1                                 | 10.24            | 11.93                                | 59              | 75                                 |  |                                      |  |
| FBP17             | s22915   | FNBP1                                 | 9.94             | 10.62                                | 90              | 84                                 |  |                                      |  |
|                   | s22916   | FNBP1                                 | 10.58            | 10.46                                | 96              | 115                                |  |                                      |  |
| 23268             | s23437   | DNMBP                                 | 9.71             | 9.59                                 | 89              | 74                                 |  |                                      |  |
| Tuba (Bar domain) | s23438   | DNMBP                                 | 11.50            | 11.83                                | 102             | 106                                |  |                                      |  |



|                                    |          | NT Avg:<br>11.34<br><i>Listeria A</i> |                  | NT Avg:<br>12.2<br><i>Listeria B</i> |                 | NT Avg:<br>83<br><i>Listeria A</i> |  | NT Avg:<br>85.7<br><i>Listeria B</i> |  |
|------------------------------------|----------|---------------------------------------|------------------|--------------------------------------|-----------------|------------------------------------|--|--------------------------------------|--|
| increased 2+ SD<br>decreased 2+ SD |          |                                       |                  |                                      |                 |                                    |  |                                      |  |
| Entrez Gene ID                     | siRNA ID | Gene Symbol                           | Avg Cluster Size | Avg Cluster Size                     | # Clusters/well | # Clusters/well                    |  |                                      |  |
|                                    | s23439   | DNMBP                                 | 9.18             | 9.33                                 | 92              | 76                                 |  |                                      |  |
| 23380                              | s23693   | SRGAP2                                | 11.51            | 12.50                                | 89              | 80                                 |  |                                      |  |
| srGAP2 (F-bar)                     | s23692   | SRGAP2                                | 9.67             | 9.99                                 | 82              | 98                                 |  |                                      |  |
|                                    | s23691   | SRGAP2                                | 9.57             | 10.38                                | 88              | 92                                 |  |                                      |  |
| 23607                              | s24191   | CD2AP                                 | 9.56             | 12.64                                | 89              | 104                                |  |                                      |  |
| CD2AP                              | s24192   | CD2AP                                 | 8.26             | 13.13                                | 76              | 72                                 |  |                                      |  |
|                                    | s24193   | CD2AP                                 | 7.59             | 11.82                                | 68              | 72                                 |  |                                      |  |
| 25945                              | s24804   | PVRL3                                 | 9.91             | 12.86                                | 76              | 86                                 |  |                                      |  |
| Nectin-3                           | s24803   | PVRL3                                 | 11.18            | 13.37                                | 112             | 108                                |  |                                      |  |
|                                    | s24802   | PVRL3                                 | 11.22            | 12.19                                | 91              | 89                                 |  |                                      |  |
| 26052                              | s25018   | DNM3                                  | 10.08            | 11.78                                | 96              | 81                                 |  |                                      |  |
| Dynamin-3                          | s25017   | DNM3                                  | 13.94            | 12.97                                | 95              | 94                                 |  |                                      |  |
|                                    | s25019   | DNM3                                  | 8.15             | 13.25                                | 47              | 60                                 |  |                                      |  |
| 29763                              | s26562   | PACSIN3                               | 11.02            | 10.73                                | 81              | 86                                 |  |                                      |  |
| Pacsin3 (F-bar)                    | s26563   | PACSIN3                               | 10.21            | 10.44                                | 81              | 103                                |  |                                      |  |
|                                    | s26564   | PACSIN3                               | 6.88             | 8.06                                 | 25              | 50                                 |  |                                      |  |
| 50807                              | s27099   | ASAP1                                 | 14.04            | 13.65                                | 85              | 106                                |  |                                      |  |
| ASAP1                              | s27101   | ASAP1                                 | 12.25            | 14.79                                | 79              | 84                                 |  |                                      |  |
|                                    | s27100   | ASAP1                                 | 8.03             | 9.24                                 | 77              | 80                                 |  |                                      |  |
| 50848                              | s27150   | F11R                                  | 9.92             | 13.40                                | 72              | 77                                 |  |                                      |  |
| JAM-A                              | s27151   | F11R                                  | 10.09            | 11.03                                | 69              | 86                                 |  |                                      |  |
|                                    | s27152   | F11R                                  | 8.39             | 8.87                                 | 57              | 89                                 |  |                                      |  |
| 51160                              | s27577   | VPS28                                 | 10.86            | 10.68                                | 91              | 107                                |  |                                      |  |
| hVps28 (Escrt-1)                   | s27578   | VPS28                                 | 9.09             | 10.19                                | 82              | 93                                 |  |                                      |  |
|                                    | s27579   | VPS28                                 | 8.44             | 8.87                                 | 75              | 91                                 |  |                                      |  |
| 51294                              | s27870   | PCDH12                                | 9.99             | 14.64                                | 96              | 86                                 |  |                                      |  |
| VE-Cadherin                        | s27869   | PCDH12                                | 11.29            | 12.51                                | 94              | 93                                 |  |                                      |  |
|                                    | s27871   | PCDH12                                | 8.74             | 12.72                                | 91              | 98                                 |  |                                      |  |
| 51652                              | s28475   | VPS24                                 | 10.13            | 11.08                                | 90              | 99                                 |  |                                      |  |
| CHMP3 (ESCRT-III)                  | s28474   | VPS24                                 | 14.53            | 15.25                                | 96              | 105                                |  |                                      |  |
|                                    | s28473   | VPS24                                 | 13.35            | 15.48                                | 86              | 94                                 |  |                                      |  |
| 54874                              | s29645   | FNBP1L                                | 10.73            | 12.82                                | 86              | 105                                |  |                                      |  |
| TOCA1                              | s29646   | FNBP1L                                | 10.82            | 10.75                                | 96              | 92                                 |  |                                      |  |
|                                    | s29644   | FNBP1L                                | 8.88             | 10.91                                | 86              | 78                                 |  |                                      |  |
| 56904                              | s32358   | SH3GLB2                               | 10.82            | 11.27                                | 90              | 75                                 |  |                                      |  |
| Endophilin-B2                      | s32357   | SH3GLB2                               | 8.69             | 10.80                                | 84              | 74                                 |  |                                      |  |
|                                    | s32359   | SH3GLB2                               | 10.50            | 12.01                                | 111             | 103                                |  |                                      |  |
| 57522                              | s33218   | SRGAP1                                | 4.63             | 5.24                                 | 73              | 76                                 |  |                                      |  |
| srGAP1                             | s33219   | SRGAP1                                | 13.35            | 11.33                                | 99              | 94                                 |  |                                      |  |
|                                    | s33217   | SRGAP1                                | 13.89            | 10.29                                | 94              | 102                                |  |                                      |  |
| 58494                              | s33856   | JAM2                                  | 11.82            | 18.52                                | 89              | 81                                 |  |                                      |  |
| JAM-B                              | s33857   | JAM2                                  | 9.88             | 12.90                                | 91              | 88                                 |  |                                      |  |
|                                    | s33855   | JAM2                                  | 11.52            | 12.82                                | 95              | 85                                 |  |                                      |  |
| 83660                              | s38090   | TLN2                                  | 9.95             | 9.82                                 | 85              | 98                                 |  |                                      |  |
| Talin-2                            | s38088   | TLN2                                  | 8.99             | 11.16                                | 69              | 68                                 |  |                                      |  |
|                                    | s38089   | TLN2                                  | 9.12             | 10.65                                | 94              | 97                                 |  |                                      |  |

|                |          |             | NT Avg:<br>11.34<br><i>Listeria A</i> | NT Avg:<br>12.2<br><i>Listeria B</i> | NT Avg:<br>83<br><i>Listeria A</i> | NT Avg:<br>85.7<br><i>Listeria B</i> |
|----------------|----------|-------------|---------------------------------------|--------------------------------------|------------------------------------|--------------------------------------|
|                |          |             | Avg Cluster Size                      | Avg Cluster Size                     | # Clusters/well                    | # Clusters/well                      |
| Entrez Gene ID | siRNA ID | Gene Symbol |                                       |                                      |                                    |                                      |
| 83700          | s38127   | JAM3        | 7.90                                  | 10.36                                | 48                                 | 45                                   |
| JAM-C          | s38129   | JAM3        | 6.68                                  | 8.27                                 | 37                                 | 55                                   |
|                | s38128   | JAM3        | 12.20                                 | 13.11                                | 105                                | 93                                   |
| 92154          | s40868   | MTSS1L      | 10.18                                 | 10.52                                | 57                                 | 69                                   |
| ABBA           | s40867   | MTSS1L      | 10.70                                 | 11.16                                | 98                                 | 92                                   |
|                | s40869   | MTSS1L      | 9.24                                  | 8.46                                 | 66                                 | 56                                   |
| 115677         | s41845   | NOSTRIN     | 10.88                                 | 10.96                                | 75                                 | 75                                   |
| Nostrin        | s41847   | NOSTRIN     | 11.05                                 | 12.64                                | 111                                | 80                                   |
|                | s41846   | NOSTRIN     | 10.91                                 | 13.49                                | 87                                 | 99                                   |
| 125111         | s42859   | GJD3        | 10.94                                 | 10.27                                | 70                                 | 70                                   |
| Connexin 31.9  | s42857   | GJD3        | 10.36                                 | 10.21                                | 78                                 | 80                                   |
|                | s42858   | GJD3        | 11.19                                 | 9.25                                 | 59                                 | 92                                   |
| 127534         | s43186   | GJB4        | 8.89                                  | 6.38                                 | 55                                 | 52                                   |
| Connexin 30.3  | s43185   | GJB4        | 7.39                                  | 10.41                                | 62                                 | 76                                   |
|                | s43184   | GJB4        | 10.00                                 | 10.99                                | 77                                 | 99                                   |
| 147409         | s44997   | DSG4        | 10.79                                 | 11.67                                | 81                                 | 99                                   |
| desmoglein-4   | s44999   | DSG4        | 11.78                                 | 11.85                                | 54                                 | 78                                   |
|                | s44998   | DSG4        | 11.25                                 | 10.94                                | 81                                 | 97                                   |
| 284119         | s49506   | PTRF        | 14.22                                 | 14.20                                | 96                                 | 109                                  |
| Cavin-1        | s49507   | PTRF        | 7.94                                  | 9.32                                 | 31                                 | 68                                   |
|                | s49508   | PTRF        | 10.05                                 | 10.82                                | 55                                 | 68                                   |
| 100506658      | s446558  | OCLN        | 12.00                                 | 11.89                                | 107                                | 94                                   |
| Occludin       | s446559  | OCLN        | 14.04                                 | 13.94                                | 76                                 | 98                                   |
|                | s446560  | OCLN        | 11.08                                 | 13.78                                | 106                                | 97                                   |

Table S2

| RefSeq Accession Number | Gene Symbol   | Full Gene Name                                  | Gene ID      | siRNA ID | Sense siRNA Sequence   | Antisense siRNA Sequence |
|-------------------------|---------------|-------------------------------------------------|--------------|----------|------------------------|--------------------------|
| AK074205                | <u>ARPC4</u>  | actin related protein 2/3 complex, subunit 4,   | <u>10093</u> | n288550  | UCAACAUAUUUUACUUAUtt   | AUAAGUAAAUGAUUGUAGt      |
| AK074205                | <u>ARPC4</u>  | actin related protein 2/3 complex, subunit 4,   | <u>10093</u> | n288549  | AAAUUCAGGUGCAUCAAAtt   | UUUGGAUGCACCUGAAUUGt     |
| AK074205                | <u>ARPC4</u>  | actin related protein 2/3 complex, subunit 4,   | <u>10093</u> | n288548  | GGUCUAAGAAGUACCAUAtt   | UAUUGGUACUUUCUJAGAC Ctc  |
| NM_004930               | <u>CAPZB</u>  | capping protein (actin filament) muscle Z-line, | <u>832</u>   | s2403    | GAAGUACGCGUAACGAGAUtt  | AUCUCGUUCAGCGUACUUCt     |
| NM_004930               | <u>CAPZB</u>  | capping protein (actin filament) muscle Z-line, | <u>832</u>   | s2402    | GACUUUUUGCAGACAAAUAtt  | UGAUUUUGUCUGCAAAGUCt     |
| NM_004930               | <u>CAPZB</u>  | capping protein (actin filament) muscle Z-line, | <u>832</u>   | s2401    | CGAGAUUCUACUUGGAAAtt   | UUUUCCAAAGUAGAUUCGt      |
| NM_001030006            | <u>AP2B1</u>  | adaptor-related protein complex 2, beta 1       | <u>163</u>   | s38      | GGCUUGGAGAUUUCCGGAAtt  | UUCCGGAAAUCCCAAGCctt     |
| NM_001030006            | <u>AP2B1</u>  | adaptor-related protein complex 2, beta 1       | <u>163</u>   | s37      | GGAGGGUUUUACAGUAAtt    | UUCAUCUGAAAACCCUCag      |
| NM_001030006            | <u>AP2B1</u>  | adaptor-related protein complex 2, beta 1       | <u>163</u>   | s36      | GGAUCCUUAUGUUCGGAAAtt  | UUUCCGAACUAGGGAUCCtc     |
| NM_001663               | <u>ARF6</u>   | ADP-ribosylation factor 6                       | <u>382</u>   | s1567    | CCAAGGUCUCAUCUUGUAtt   | UACGAAGAUGAGACCUUGGct    |
| NM_001663               | <u>ARF6</u>   | ADP-ribosylation factor 6                       | <u>382</u>   | s1565    | GUUCUACUUCUUGUAGUAtt   | UCCACUACGAAGUAGUAGct     |
| NM_001663               | <u>ARF6</u>   | ADP-ribosylation factor 6                       | <u>382</u>   | s223978  | CUAAGACCAGUAUAGUAAAtt  | UUUACUUAUCUGUCUUA GAt    |
| NM_001664               | <u>RHOA</u>   | ras homolog family member A                     | <u>387</u>   | s760     | GGUUUUACUCCGUAAAGAtt   | UCUGUUACGGAGUAAAAGCCt    |
| NM_001664               | <u>RHOA</u>   | ras homolog family member A                     | <u>387</u>   | s759     | CUAUGAUUUUAACGUAUtt    | ACUAGCUUUAUAUAAGAtt      |
| NM_001664               | <u>RHOA</u>   | ras homolog family member A                     | <u>387</u>   | s758     | CACAGUUGUUUGAAGAUtt    | AUAGUUCUCAACACUUGGg      |
| NM_001042678            | <u>RHOC</u>   | ras homolog family member C                     | <u>389</u>   | s99      | AGGACUGCAUUGUUUUCUtt   | UAGAAAACAUGCAGUCCBg      |
| NM_001042678            | <u>RHOC</u>   | ras homolog family member C                     | <u>389</u>   | s98      | CACCAGCACUUUAUCACUtt   | UAUGUUAAAAGUGUAGGUGt     |
| NM_001042678            | <u>RHOC</u>   | ras homolog family member C                     | <u>389</u>   | s97      | GCAAGGAUCAGUUUCGGAtt   | UCCGGAACUAGUCCUUGCt      |
| NM_004041               | <u>ARRB1</u>  | arrestin, beta 1                                | <u>408</u>   | s1622    | GGCUUGCGGUGUGGACUAAtt  | AUAGUCCACCCGCAAGCctt     |
| NM_004041               | <u>ARRB1</u>  | arrestin, beta 1                                | <u>408</u>   | s1624    | CCAAUUCUUGAGUAUAtt     | UCAAGUUCUUAUGAUUGGta     |
| NM_004041               | <u>ARRB1</u>  | arrestin, beta 1                                | <u>408</u>   | s1623    | GGAGAUUCUUAUACCAUGAtt  | UCCAUGGUUAUAGAUUC Cct    |
| NM_004313               | <u>ARRB2</u>  | arrestin, beta 2                                | <u>409</u>   | s1627    | AGCCUUCUGUGCUAAUAtt    | UGAUUUAGCACAGAGGCUcg     |
| NM_004313               | <u>ARRB2</u>  | arrestin, beta 2                                | <u>409</u>   | s1625    | AAGUCUCUGUGAGACAGUtt   | UACUGUCUCACAGAGAUUGt     |
| NM_004313               | <u>ARRB2</u>  | arrestin, beta 2                                | <u>409</u>   | s1626    | CGAACAAAGUAGACCAGUAtt  | UACCUGGUCAUCUUGUUCGag    |
| NM_001753               | <u>CAV1</u>   | caveolin 1, caveolae protein, 22kDa             | <u>857</u>   | s2447    | GCCGUGUCUUAUCCAUCUAtt  | UAGAUGGAAUAGACACGGCct    |
| NM_001753               | <u>CAV1</u>   | caveolin 1, caveolae protein, 22kDa             | <u>857</u>   | s2446    | GCUUCUGAUUGAGAUUAtt    | UGAAUUCUUAUAGACUCCtc     |
| NM_001753               | <u>CAV1</u>   | caveolin 1, caveolae protein, 22kDa             | <u>857</u>   | s2448    | CCUUCACUGUGACGAAUAtt   | UUAUUUCGUCACAGUAGGt      |
| NM_001233               | <u>CAV2</u>   | caveolin 2                                      | <u>858</u>   | s2451    | AGACCUGCCUAAUGGUUCUtt  | AGAACCAUAGGCGAGUCUtt     |
| NM_001233               | <u>CAV2</u>   | caveolin 2                                      | <u>858</u>   | s2449    | AUGUUUAUCUUAUUGCUUAtt  | AUUGGAGCAUUGAUAGAUct     |
| NM_001233               | <u>CAV2</u>   | caveolin 2                                      | <u>858</u>   | s2450    | CGGCUCAACUCGCAUCUAtt   | UGAGAUGCAGUUGAGCCGgt     |
| NM_001769               | <u>CD9</u>    | CD9 molecule                                    | <u>928</u>   | s2598    | UCUUCGAGCAAGAACUAtt    | UUAGUUUCUUGCUCGAAGAt     |
| NM_001769               | <u>CD9</u>    | CD9 molecule                                    | <u>928</u>   | s2597    | AGAGGUUCUUCGACAAUAtt   | UUUAUUGUCGAAGACCUUtt     |
| NM_001769               | <u>CD9</u>    | CD9 molecule                                    | <u>928</u>   | s2599    | CAGUUUAUCUCAGACAUUtt   | AGAUGUCUGAGUAUAAUGct     |
| AF086543                | <u>CD44</u>   | CD44 molecule (Indian blood group)              | <u>960</u>   | n284408  | UGAAGCAUUUAGAAUUAAtt   | UAUGAUUCUAAAUGCUUACt     |
| AK123567                | <u>CD44</u>   | CD44 molecule (Indian blood group)              | <u>960</u>   | n307357  | GAUUCUCUUGAGUAGUAAAtt  | UUUAUACUCAAGAGAUAGct     |
| AF086543                | <u>CD44</u>   | CD44 molecule (Indian blood group)              | <u>960</u>   | n284407  | UACACUUCUUAUAGUUCUAtt  | UAAAGAACUAAGGAGUGUAag    |
| NM_001040034            | <u>CD63</u>   | CD63 molecule                                   | <u>967</u>   | s2699    | AGAUAUACCCGAAAAAAtt    | UUUUUUUCUGGGUAAUUCc      |
| NM_001040034            | <u>CD63</u>   | CD63 molecule                                   | <u>967</u>   | s2700    | GGAUAGCAGGCAGAUUUUAAtt | UUAAAAUCUGCCUGCAUCct     |
| NM_001040034            | <u>CD63</u>   | CD63 molecule                                   | <u>967</u>   | s2701    | GGAUUAAUUAUACGAGAAAtt  | UUUCUGUUGAAUUUAUCCca     |
| NM_004356               | <u>CD81</u>   | CD81 molecule                                   | <u>975</u>   | s2723    | GAACUUUCUGUUAUCCUtt    | AAAGGUAAACAGGAAAGUUCag   |
| NM_004356               | <u>CD81</u>   | CD81 molecule                                   | <u>975</u>   | s2722    | GCCCAACACCUUUAUUGUtt   | UACAUAAGAAGGUGUUGGGcgc   |
| NM_004356               | <u>CD81</u>   | CD81 molecule                                   | <u>975</u>   | s2724    | CCACCUACAGUCUCAAGAAtt  | UUUCUUGAGCAGUAGGUGGtc    |
| NM_001039490            | <u>CD151</u>  | CD151 molecule (Raph blood group)               | <u>977</u>   | s194332  | CCCACUACUGAGCUGAGAtt   | UCCAGCUCAGUAGUUUGGGtg    |
| NM_001039490            | <u>CD151</u>  | CD151 molecule (Raph blood group)               | <u>977</u>   | s194333  | GGUUUUUGCUGCGACCAAtt   | UUUGGUCGACAGAAAGCCac     |
| NM_001039490            | <u>CD151</u>  | CD151 molecule (Raph blood group)               | <u>977</u>   | s2728    | CUGCUGCGCCUGUACUAtt    | UGAAGUACAGGCGCAGAGgt     |
| NM_001039802            | <u>CDC42</u>  | cell division cycle 42 (GTP binding protein,    | <u>998</u>   | s2767    | CAGUUUAUGAUUGGUGAGAtt  | UCCUCCACCAUUAUUAUCGt     |
| NM_001039802            | <u>CDC42</u>  | cell division cycle 42 (GTP binding protein,    | <u>998</u>   | s2766    | UGAGAUAAUCACACCUUtt    | ACAGUUGGAGUUAUUAUCAgg    |
| NM_001039802            | <u>CDC42</u>  | cell division cycle 42 (GTP binding protein,    | <u>998</u>   | s2765    | UGGUGCUGUUGGUAAAAtt    | UGUUUUUACCAACAGCACctt    |
| NM_004360               | <u>CDH1</u>   | cadherin 1, type 1, E-cadherin (epithelial)     | <u>999</u>   | s2768    | GAACUAUUAUUCUUGUAtt    | UCACAGAAGAUAUUAUGUcga    |
| NM_004360               | <u>CDH1</u>   | cadherin 1, type 1, E-cadherin (epithelial)     | <u>999</u>   | s2769    | CAACAGCUGUGUACAGUtt    | ACUGUGAUACACAGUUGGct     |
| NM_004360               | <u>CDH1</u>   | cadherin 1, type 1, E-cadherin (epithelial)     | <u>999</u>   | s2770    | CGUAUACCCUGGUGGUAtt    | UGAACCCACAGGGUUAUCGta    |
| NM_001792               | <u>CDH2</u>   | cadherin 2, type 1, N-cadherin (neuronal)       | <u>1000</u>  | s2772    | GGUUAUCCUCCAAUUAAtt    | UGAUUUGGAGGUAUACCCga     |
| NM_001792               | <u>CDH2</u>   | cadherin 2, type 1, N-cadherin (neuronal)       | <u>1000</u>  | s2773    | GAACAUAGUGUAGACCGUtt   | ACGGUCUACAUUAUGUUCca     |
| NM_001792               | <u>CDH2</u>   | cadherin 2, type 1, N-cadherin (neuronal)       | <u>1000</u>  | s2771    | GUGCAACAGUAUACGUUAtt   | UUAAAGUAUACUGUUGCact     |
| NM_001025205            | <u>AP2M1</u>  | adaptor-related protein complex 2, mu 1         | <u>1173</u>  | s3114    | GAAGAGCAGUCACAGAUAtt   | UGAUUCUGGAGUUGUUCctt     |
| NM_001025205            | <u>AP2M1</u>  | adaptor-related protein complex 2, mu 1         | <u>1173</u>  | s3112    | GGAUAGAUUCUAGACUAtt    | AAAGUCUAGAUAUCUACcag     |
| NM_001025205            | <u>AP2M1</u>  | adaptor-related protein complex 2, mu 1         | <u>1173</u>  | s3113    | GGCGAGAGGGUAUAAUAtt    | UACUUGAUACCCUUCGCGc      |
| NM_004859               | <u>CLTC</u>   | clathrin, heavy chain (Hc)                      | <u>1213</u>  | s477     | GGGAUUUCUUGUUAUCCAtt   | UCCGUAACGAAGAUAUCCctt    |
| NM_004859               | <u>CLTC</u>   | clathrin, heavy chain (Hc)                      | <u>1213</u>  | s476     | CGGUUGUCUUGUUAUCCGAtt  | UGGUAUACAGGACCAACGta     |
| NM_004859               | <u>CLTC</u>   | clathrin, heavy chain (Hc)                      | <u>1213</u>  | s475     | GGUUGCUCUUGUUAUCCGAtt  | AUCCGUAAACAGGACCAACct    |
| NM_001903               | <u>CTNNA1</u> | catenin (cadherin-associated protein), alpha 1, | <u>1495</u>  | s3716    | GUGGAUUAAGCUGAAUUAAtt  | UAAGUUUACAGUUAUCCctt     |
| NM_001903               | <u>CTNNA1</u> | catenin (cadherin-associated protein), alpha 1, | <u>1495</u>  | s3717    | GUGUAAAGCUUUGUUGAAUtt  | AUUCGAAACAGCUUUAACct     |
| NM_001903               | <u>CTNNA1</u> | catenin (cadherin-associated protein), alpha 1, | <u>1495</u>  | s3718    | CUACGUCGCCUUAACAAAtt   | UUUGGUAGAGGCGAGUAGga     |
| NM_004389               | <u>CTNNA2</u> | catenin (cadherin-associated protein), alpha 2  | <u>1496</u>  | s3719    | CAUUGUUUCUUGUUGUUAAtt  | AAUCAGCAAGGAAAGUAGt      |
| NM_004389               | <u>CTNNA2</u> | catenin (cadherin-associated protein), alpha 2  | <u>1496</u>  | s3721    | CAGCGGCAUUAUUAUUAAtt   | AAUGAUUAUUAUUGCCGUGt     |
| NM_004389               | <u>CTNNA2</u> | catenin (cadherin-associated protein), alpha 2  | <u>1496</u>  | s3720    | CGCUUAUCCAGGACGUUAAtt  | UUAGUCUCCUGUAUAGCGGat    |
| NM_001904               | <u>CTNNB1</u> | catenin (cadherin-associated protein), beta 1,  | <u>1499</u>  | s438     | CUGUUGGAUUAUUAUUAAtt   | UUUCGAAUUAUUAUUAAGt      |
| NM_001904               | <u>CTNNB1</u> | catenin (cadherin-associated protein), beta 1,  | <u>1499</u>  | s437     | GGAUUUUACAACCGAAUtt    | AAUUCGGUUGUAGAAUUCcg     |
| NM_001904               | <u>CTNNB1</u> | catenin (cadherin-associated protein), beta 1,  | <u>1499</u>  | s436     | GGACCUUAUUAUUAUUAAtt   | UUUUUCGAAUUAUUAUGUCCtc   |
| NM_001085458            | <u>CTNND1</u> | catenin (cadherin-associated protein), delta 1  | <u>1500</u>  | s3726    | CAUUGACCCGGAACAAAtt    | UUUUUGGUUCGGUUAUAGg      |
| NM_001085458            | <u>CTNND1</u> | catenin (cadherin-associated protein), delta 1  | <u>1500</u>  | s3725    | GUCGCAACAAAGAAUUAAtt   | UUAAUUCUUGUUGCGAGCat     |
| NM_001085458            | <u>CTNND1</u> | catenin (cadherin-associated protein), delta 1  | <u>1500</u>  | s3727    | GAACUUUAUUAUUAUUAAtt   | AAUUCUUAUUAUUAUUAUGCcg   |
| AK092344                | <u>DNM2</u>   | dynamitin 2                                     | <u>1785</u>  | n285562  | ACUGUUUUGUUAACCAAGAtt  | UCUGUUUUAACAACAAGUtg     |
| AK092344                | <u>DNM2</u>   | dynamitin 2                                     | <u>1785</u>  | n285561  | GCACUGGGCCGUCCUUAUtt   | UAUAAGGACGCCAGUGGct      |
| AK092344                | <u>DNM2</u>   | dynamitin 2                                     | <u>1785</u>  | n285560  | GGAGGGAGAGUUUACGCAAtt  | UUUCGUAACUUCUCCUCct      |
| NM_024422               | <u>DSC2</u>   | desmocollin 2                                   | <u>1824</u>  | s4311    | GGUUCAGUCUUAUUAUUAAtt  | UUUGUUAUUAUUAUUAAGct     |
| NM_024422               | <u>DSC2</u>   | desmocollin 2                                   | <u>1824</u>  | s4309    | GACUUAUGUCGACAUUAAtt   | UAUAUGUCAGGACAUAGUctt    |
| NM_024422               | <u>DSC2</u>   | desmocollin 2                                   | <u>1824</u>  | s4310    | GCUCUUAUUAUUAUUAAtt    | AUAGGUUUAUUAUUAUUAAGcga  |
| NM_001941               | <u>DSC3</u>   | desmocollin 3                                   | <u>1825</u>  | s4312    | GACGUGGAGUUAUUAUUAAtt  | UCUUUUAUUAUUAUUAUUAAGcga |
| NM_001941               | <u>DSC3</u>   | desmocollin 3                                   | <u>1825</u>  | s4313    | CCCAUUAUGUGCGGAUUAAtt  | UUAUUCGCAUUAUUAUUAAGct   |

|              |       |                                       |      |         |                        |                        |
|--------------|-------|---------------------------------------|------|---------|------------------------|------------------------|
| NM_001941    | DSC3  | desmocollin 3                         | 1825 | s4314   | GAUCAACGGCUAAUAGGCAtt  | UGCCUUUAUAGCCGUUGAUcct |
| NM_001942    | DSG1  | desmoglein 1                          | 1828 | s4321   | GAACGAUUCUCUCUAUAGAtt  | UCUAUAGAGAGAAUUGGUcct  |
| NM_001942    | DSG1  | desmoglein 1                          | 1828 | s4323   | CAUCCAAUAGUUGAUCGAGAtt | UCUCGUAACAACUAUGGAGtt  |
| NM_001942    | DSG1  | desmoglein 1                          | 1828 | s4322   | CUGACGCAGAUAGAACGAAtt  | UUCGGUUUAUCUUGCGUCAGta |
| NM_001943    | DSG2  | desmoglein 2                          | 1829 | s4326   | CCAGAUUCUUGAUCGAGAtt   | UCUCGUAACAAGAAUUGCUGta |
| NM_001943    | DSG2  | desmoglein 2                          | 1829 | s4324   | CUGUUGCACUGAACGAAGAtt  | UCUUCGUUCAGUGCAACGca   |
| NM_001943    | DSG2  | desmoglein 2                          | 1829 | s4325   | CAUACCCUUGAAUUCGAAAtt  | UUUCGAAUUCAGGGUUAUUGgg |
| NM_001008844 | DSP   | desmoplakin                           | 1832 | s4335   | CCGACUGACUUAUGAGAUUtt  | AAUCUAUAAGUCAGUCGGgt   |
| NM_001008844 | DSP   | desmoplakin                           | 1832 | s4334   | GGACCUCAUUGACUUCGUAAtt | AUCGAAGUCAUUGAGGUCCcg  |
| NM_001008844 | DSP   | desmoplakin                           | 1832 | s4333   | GGAACGGUGCAGAAUCGAAtt  | UUCGAUUCUGCACCGUUCctt  |
| NM_001405    | EFNA2 | ephrin-A2                             | 1943 | s194390 | CCACGAGUUAUACUACAUcct  | GAUGUAGUAUAUCUGUGGcct  |
| NM_001405    | EFNA2 | ephrin-A2                             | 1943 | s223469 | GGAGCACUACGUGCUGUAcct  | GUACAGCACGUAUGUCCcat   |
| NM_001405    | EFNA2 | ephrin-A2                             | 1943 | s4500   | CGAGUAUUAUACUACUcctt   | AGAGAUAGUAUAUACUCGtg   |
| NM_004952    | EFNA3 | ephrin-A3                             | 1944 | s4501   | GGAUUGUGGUUUGGAUUGAtt  | UCAAUCCAACCAAAUUCctg   |
| NM_004952    | EFNA3 | ephrin-A3                             | 1944 | s4502   | ACACUUUUGGAGACCGUAAtt  | UUACGGUUCGAAAGUUGct    |
| NM_004952    | EFNA3 | ephrin-A3                             | 1944 | s4503   | AGGUGAACGUGAACGACUAtt  | UAGUCGUUCAGGUUCACUg    |
| BC042610     | EFNA4 | ephrin-A4                             | 1945 | n371795 | AGAAACAAACUUCAGGGUAtt  | AACCCUGAAGUUUUUGUcctt  |
| BC042610     | EFNA4 | ephrin-A4                             | 1945 | n371794 | AGACAACCAACUCAGCUAAtt  | UUAGCUGAGUUGGUUUGUcct  |
| BC042610     | EFNA4 | ephrin-A4                             | 1945 | n371793 | AGUCCGUCUUAUAGAAGAtt   | UCUUCUAUGAAGACGGAUcct  |
| NM_001962    | EFNA5 | ephrin-A5                             | 1946 | s4508   | GGCCGAGAAUUAUUCUACAtt  | UGUAGAAUAUUCUCGGCctg   |
| NM_001962    | EFNA5 | ephrin-A5                             | 1946 | s4507   | CGAUGUUAACGCACAAGUAtt  | UACUUUGUCGUUAACAUUGGaa |
| NM_001962    | EFNA5 | ephrin-A5                             | 1946 | s4509   | GGUCUGUCUUAAGCUAAtt    | UUGAGCUUUAAGACAGACctt  |
| NM_004429    | EFNB1 | ephrin-B1                             | 1947 | s4511   | GGAGGGCUUUGGUGAUcctt   | UAGAUCCAAGCCUUCccta    |
| NM_004429    | EFNB1 | ephrin-B1                             | 1947 | s4510   | UGACGGUCCUACUACUAGAtt  | UUUCAGUAGUAGGACCGUcagg |
| NM_004429    | EFNB1 | ephrin-B1                             | 1947 | s4512   | CUGUCUACUUGUCCAAGAtt   | UCUUGGACGAUGUAGACAGgg  |
| NM_004093    | EFNB2 | ephrin-B2                             | 1948 | s4515   | GGAGAAGUUGGACAACAAtt   | UUGUUGUCGAACUUCUCCat   |
| NM_004093    | EFNB2 | ephrin-B2                             | 1948 | s4513   | CCAAUUCGUAUAGUUUAGAtt  | UCUAAAACUAUCGUAUUGGaa  |
| NM_004093    | EFNB2 | ephrin-B2                             | 1948 | s4514   | GACAAGGACUGGUACUAUAtt  | UAUAGUACCGUCCUUCGca    |
| NM_004431    | EPHA2 | EPH receptor A2                       | 1969 | s4564   | UGAUGAUCAUCACUGAUAtt   | UACUCAGUGAUGAUAUCAtg   |
| NM_004431    | EPHA2 | EPH receptor A2                       | 1969 | s4566   | GUAUCUUAUUGAGCUAAtt    | UUGAGCUCAUUAAGAUAGcgc  |
| NM_004431    | EPHA2 | EPH receptor A2                       | 1969 | s4565   | GGAGUACGAGGUCACUAtt    | UAAGUAGCCUGUACUUCcag   |
| AK023333     | CTTN  | cortactin                             | 2017 | n345349 | GCGCCAGCUGAAACUUGAtt   | UCAAGUUUCAGCUGGGCCag   |
| AK023333     | CTTN  | cortactin                             | 2017 | n345348 | CCUGAGCAGUUGAUUUUcctt  | UGAAAAUCAACUCGUCAGGta  |
| AK023333     | CTTN  | cortactin                             | 2017 | n345347 | AAACCAGAGUUGUUAUUUtt   | AAUUUAACAACUCUGGUUcct  |
| NM_005232    | EPHA1 | EPH receptor A1                       | 2041 | s4721   | CCUCAGUAUACACAUAUAtt   | AUAUUUGUAGUUAUCGAGGtt  |
| NM_005232    | EPHA1 | EPH receptor A1                       | 2041 | s4719   | GGUACAGAUUGGUUCUAGAtt  | UCUAGAACAUCUGGUUACcgt  |
| NM_005232    | EPHA1 | EPH receptor A1                       | 2041 | s223490 | GAUGAAGAACGGUACCAAGAtt | UCUGGUACCGUUCUUAUcct   |
| NM_182644    | EPHA3 | EPH receptor A3                       | 2042 | s4724   | CGAGGUCAAAUACUAGAtt    | UUCAUAGUAUUUGACUCGta   |
| NM_182644    | EPHA3 | EPH receptor A3                       | 2042 | s4722   | GGAUGUACUGCAGUACAGAtt  | UCUGUACUGCAGUACAUcctt  |
| NM_182644    | EPHA3 | EPH receptor A3                       | 2042 | s4723   | CACCUGUCCUGACGUAUAtt   | UUAUACGUCAGGACAGGgat   |
| NM_004440    | EPHA7 | EPH receptor A7                       | 2045 | s4733   | CAGCUAAUUGUUGAUUGUtt   | AACAUAUCAACAUUAGCUGgt  |
| NM_004440    | EPHA7 | EPH receptor A7                       | 2045 | s4731   | GAUGGGCAAUUUACAGUCAtt  | UGACUGUAAAUUGCCAUcat   |
| NM_004440    | EPHA7 | EPH receptor A7                       | 2045 | s4732   | GGAACGGACCUACUACACAtt  | UUUGGAGUAGGUUCGUUCcct  |
| NM_001006943 | EPHA8 | EPH receptor A8                       | 2046 | s4736   | CCUCAAAUUCGACACCAUtt   | AAUUGGUGUCGAUUUUGAGGaa |
| NM_001006943 | EPHA8 | EPH receptor A8                       | 2046 | s4735   | GGCAUCAGUACUCUGGAtt    | UCCAGAGUCACUAGUCCca    |
| NM_001006943 | EPHA8 | EPH receptor A8                       | 2046 | s223498 | GUUCUACGCUAACACGGAtt   | UCCGUGUUGAGCUUGAGGcgc  |
| NM_004442    | EPHB2 | EPH receptor B2                       | 2048 | s4742   | AGAUGAUCCGCAUUCcctt    | UUGGGAUUUGCGGAUUCUtg   |
| NM_004442    | EPHB2 | EPH receptor B2                       | 2048 | s4741   | ACAUCGAUCCUUCACCUAtt   | UAGGUAAAAGGUAUGUAg     |
| NM_004442    | EPHB2 | EPH receptor B2                       | 2048 | s4740   | GCUGUACUUGGACUUAUAtt   | UCAUAGUCCAGGAUACCGca   |
| NM_004443    | EPHB3 | EPH receptor B3                       | 2049 | s4743   | GGGUUACUGUGGAGCUAAtt   | UUGAGUCCAGCAGUACCCg    |
| NM_004443    | EPHB3 | EPH receptor B3                       | 2049 | s4745   | CGAUCCUACCUACCCAGUtt   | ACUGGUGUAGGUAGGUAUCgga |
| NM_004443    | EPHB3 | EPH receptor B3                       | 2049 | s4744   | GAUUGAAGUUUAUUAUUGAtt  | UCAUAUAAACCUUCAUUCca   |
| NM_005246    | FER   | fer (fps/fes related) tyrosine kinase | 2241 | s5110   | GAUUUAUUGUCAGCAACGUAtt | UACGUUGUCUGACUUAUUCat  |
| NM_005246    | FER   | fer (fps/fes related) tyrosine kinase | 2241 | s5111   | GAACAACGGCUGCUAAGAtt   | UCUUUAGCAGCCGUUGUctg   |
| NM_005246    | FER   | fer (fps/fes related) tyrosine kinase | 2241 | s5109   | CAGGAUCAGUUAACUUAUtt   | AUAGAUUAACUGUAUCGUGca  |
| NM_002005    | FES   | feline sarcoma oncogene               | 2242 | s5114   | AGUGGGUGCUGAACCAUUGAtt | UCAUGUUUCAGCACCCCActg  |
| NM_002005    | FES   | feline sarcoma oncogene               | 2242 | s5113   | CCUCAGCAAUCAGCAGACAtt  | UGUCUGCUGAUUGCUGAGgtt  |
| NM_002005    | FES   | feline sarcoma oncogene               | 2242 | s5112   | CCACGUCUGGAGAUCCUUAAtt | UUUAGGAUCCUCCAGCUGGgt  |
| NM_004475    | FLOT2 | flotillin 2                           | 2319 | s5285   | ACAGUAAGGUCACACAGAtt   | UCUGAUGUGACCUUAUCUtg   |
| NM_004475    | FLOT2 | flotillin 2                           | 2319 | s5286   | GACUUAUAAACAGUACGUGUtt | ACACGUAUCGUUUUAUGCgg   |
| NM_004475    | FLOT2 | flotillin 2                           | 2319 | s5284   | CAAAGAUUGCUGACUUAAtt   | UUAGAGUCAGCAAUCUUGgtg  |
| NM_000165    | GJA1  | gap junction protein, alpha 1, 43kDa  | 2697 | s5757   | ACUAGCUGCUGGACAGAAtt   | UUCAUGUCCAGCAGCUAGtt   |
| NM_000165    | GJA1  | gap junction protein, alpha 1, 43kDa  | 2697 | s5758   | GGCUAAUUAACAGUGCAGAAtt | UUCUGCACUGUAUUAGCCca   |
| NM_000165    | GJA1  | gap junction protein, alpha 1, 43kDa  | 2697 | s5759   | GAACCUACAUAUCAGUAUtt   | AUACUGAUGAUGUAGGUUCgc  |
| NM_021954    | GJA3  | gap junction protein, alpha 3, 46kDa  | 2700 | s5761   | GCAUCUUAUAGCAUCUUAtt   | AAAGAUUCUAGUAGCAUGct   |
| NM_021954    | GJA3  | gap junction protein, alpha 3, 46kDa  | 2700 | s5762   | CUGUUAAGAAUUGCUGAtt    | UCAGCAUAUCUUAACAGta    |
| NM_021954    | GJA3  | gap junction protein, alpha 3, 46kDa  | 2700 | s5760   | CCACCUACUUAUGCGCACAtt  | UGUGCGCAUAGUAGGUGGga   |
| NM_002060    | GJA4  | gap junction protein, alpha 4, 37kDa  | 2701 | s5763   | ACUCACCGUGUGGUGUAAtt   | UUACCACACGGUCGAGUgc    |
| NM_002060    | GJA4  | gap junction protein, alpha 4, 37kDa  | 2701 | s5765   | GGCUUUGCCUGAGCAGAtt    | UCUGUCUCAGGCAAGCCac    |
| NM_002060    | GJA4  | gap junction protein, alpha 4, 37kDa  | 2701 | s5764   | CGACCGUGUGGUGUAAGAUtt  | AUCUUAACCACACCGGUGg    |
| NM_005266    | GJA5  | gap junction protein, alpha 5, 40kDa  | 2702 | s5767   | GCACUCUGCUAACACCUAtt   | UAGGUGUUGAGCAGAGUCCc   |
| NM_005266    | GJA5  | gap junction protein, alpha 5, 40kDa  | 2702 | s5768   | CUAUAUAGUGACAAGCGAtt   | UCGCUUGUCACUUAUGAUg    |
| NM_005266    | GJA5  | gap junction protein, alpha 5, 40kDa  | 2702 | s5766   | CCGGUACAUCUUAUCUUAAtt  | AUACGUUAACUUGAGCCGgtt  |
| NM_004004    | GJB2  | gap junction protein, beta 2, 26kDa   | 2706 | s5775   | AGAGUGAAUUAAGGACUAtt   | AUGCCUUAUUAUUCACUcctt  |
| NM_004004    | GJB2  | gap junction protein, beta 2, 26kDa   | 2706 | s5777   | GUUAUUUGCUAAUUAAGUAtt  | UAUCUAAUUAAGCAAAUAcac  |
| NM_004004    | GJB2  | gap junction protein, beta 2, 26kDa   | 2706 | s5776   | GGCAUCGAGGAGAUCAAAtt   | UUUGAUUCUUCGUAUUCctt   |
| NM_001005752 | GJB3  | gap junction protein, beta 3, 31kDa   | 2707 | s5779   | AGUUAACUAAGUUAUGCAAtt  | UGUUAUUAUUAUAGUACUca   |
| NM_001005752 | GJB3  | gap junction protein, beta 3, 31kDa   | 2707 | s5778   | CAAGCAAAUUAACUUAUAtt   | UAGAUAGUUAUUAUCGUgtt   |
| NM_001005752 | GJB3  | gap junction protein, beta 3, 31kDa   | 2707 | s5780   | CGACCUUACGAGAAGAAAtt   | UUUUUUUCUGGUAUGUCCgg   |
| NM_005268    | GJB5  | gap junction protein, beta 5, 31.1kDa | 2709 | s5783   | CGAGAUCCAUUGCCAAUtt    | AUUGGGACAUAGGUAUGCgtg  |
| NM_005268    | GJB5  | gap junction protein, beta 5, 31.1kDa | 2709 | s223727 | GGACUUCGACUGCAUUAUtt   | AGUAUUGCAGUCGAAGUCCctt |

|              |         |                                                  |      |         |                        |                        |
|--------------|---------|--------------------------------------------------|------|---------|------------------------|------------------------|
| NM_005268    | GJB5    | gap junction protein, beta 5, 31.1kDa            | 2709 | s5782   | GGCAUCGCCUUUCUCUAUtt   | AUAGAGAAAGGCGAUGUCac   |
| NM_000201    | ICAM1   | intercellular adhesion molecule 1                | 3383 | s7087   | AGUCAACAGCUAAAACCUUtt  | AAGGUUUUAGCUGUUGACUgc  |
| NM_000201    | ICAM1   | intercellular adhesion molecule 1                | 3383 | s7088   | AGACUACAACAGGCCAAAt    | UUUGGCCUUGUUUGAUGUCgt  |
| NM_000201    | ICAM1   | intercellular adhesion molecule 1                | 3383 | s7086   | CGGAAGGUGUUAUGAACUGAt  | UCAGUUUAUACACCUUCCGgt  |
| NM_002230    | JUP     | junction plakoglobin                             | 3728 | s7668   | GAUCAUGCGUAACUACAGUtt  | ACUGUAGUUACGCAUGAUctg  |
| NM_002230    | JUP     | junction plakoglobin                             | 3728 | s7666   | CUCUGUGCGUUCUACUAUtt   | AUAGUUUGAGACGCACAGAt   |
| NM_002230    | JUP     | junction plakoglobin                             | 3728 | s7667   | CCAUCGGCUUGAUCAGGAAt   | UUCCUGAUCAGCCGAGUGGt   |
| NM_002444    | MSN     | moesin                                           | 4478 | s8985   | GCAGUACCAGGACACUAAAt   | UUUAGUGUCUGGUACUGCag   |
| NM_002444    | MSN     | moesin                                           | 4478 | s8984   | GGCUGAAACUCAUAAGAAt    | UUUUUUUAGUAGUUUCAGCCag |
| NM_002444    | MSN     | moesin                                           | 4478 | s8986   | GGUGUGAACUACUUCAGCAt   | UGCUGAAGUAGUUCACACat   |
| NM_005389    | PCMT1   | protein-L-isoaspartate (D-aspartate) O-          | 5110 | s10130  | CCCACUAGCAAAAUGUAAt    | UUACAUUUUUGCAUAGUGGGag |
| NM_005389    | PCMT1   | protein-L-isoaspartate (D-aspartate) O-          | 5110 | s10132  | CAAUUCGCGAAAAUUGGAt    | UUUUUUUUGCGGAGAUUGtg   |
| NM_005389    | PCMT1   | protein-L-isoaspartate (D-aspartate) O-          | 5110 | s10131  | GGAUUCUCCACAUAUAUAt    | UAUUAGUUGUGGAGAUUCat   |
| NM_001042724 | PVRL2   | poliovirus receptor-related 2 (herpesvirus entry | 5819 | s11607  | CGCUGAGCAGGUCAUCUUtt   | AAAGUAGCCUGCUCAGCCgc   |
| NM_001042724 | PVRL2   | poliovirus receptor-related 2 (herpesvirus entry | 5819 | s11606  | GCUAUGAUGACACUUGUAt    | UAACGAAUGACGACAGCcg    |
| NM_001042724 | PVRL2   | poliovirus receptor-related 2 (herpesvirus entry | 5819 | s11608  | GGCUAUGACUGGAGCAGGAt   | UCCGUGCCAGUUAUAGCCcg   |
| NM_004162    | RAB5A   | RAB5A, member RAS oncogene family                | 5868 | s11678  | GGAGAGGAGUAGACCUUAt    | UAAGGUCAUCUCCUCUUCct   |
| NM_004162    | RAB5A   | RAB5A, member RAS oncogene family                | 5868 | s11680  | GCAAGCAAGUCCUAUAUAt    | AAUUUAGGACUUAUGCCct    |
| NM_004162    | RAB5A   | RAB5A, member RAS oncogene family                | 5868 | s11679  | CAAGCCUAGUGCUUCGUUtt   | AAACGAAGCACUAGCCUUGat  |
| NM_006908    | RAC1    | ras-related C3 botulinum toxin substrate 1 (rho  | 5879 | s11712  | ACAGUUAAUUUUUCCAUAt    | UAUGGAAAAUUAAUCUGUaa   |
| NM_006908    | RAC1    | ras-related C3 botulinum toxin substrate 1 (rho  | 5879 | s11711  | CUACUGUCUUUGACAUAUtt   | UAUUUUGCAAAAGACAGUg    |
| NM_006908    | RAC1    | ras-related C3 botulinum toxin substrate 1 (rho  | 5879 | s11713  | GGAAUUAACUUAUGAUUUAt   | UAAGAUCAAGUUUAGUUCca   |
| NM_002906    | RDX     | radixin                                          | 5962 | s11899  | GAACUUAACUUGCGAAGAAt   | UUUUUUGCAUGUUAUUGUc    |
| NM_002906    | RDX     | radixin                                          | 5962 | s11900  | GGAGAGACGUGUAACCGAAt   | UUCCGUUACACGCUUUCUCCt  |
| NM_002906    | RDX     | radixin                                          | 5962 | s11901  | GAUUCGACAAGGCAUAACAt   | UGUAUUUGCCUUGGCAUUCg   |
| NM_003025    | SH3GL1  | SH3-domain GRB2-like 1                           | 6455 | s12796  | GCAAGCGGUGACAGAAGUtt   | ACUUCUGUACCCGCCUUCgtg  |
| NM_003025    | SH3GL1  | SH3-domain GRB2-like 1                           | 6455 | s12797  | GACUUUGACUACAAGAAGAt   | UCUUUCUUGUAGUCAAGUCca  |
| NM_003025    | SH3GL1  | SH3-domain GRB2-like 1                           | 6455 | s12798  | GCUUCAUCGUCUUUCGGAUtt  | AUCGGAAGACGUAUAGCctg   |
| NM_003257    | TJP1    | tight junction protein 1 (zona occludens 1)      | 7082 | s14155  | GGAUUUUUAUCUGCGUAUtt   | AUUCGACGUAUAAACUCCt    |
| NM_003257    | TJP1    | tight junction protein 1 (zona occludens 1)      | 7082 | s14156  | CGAUCUCAAAACUUCGUAt    | UAAGAAGUUUUAUGAGAUGct  |
| NM_003257    | TJP1    | tight junction protein 1 (zona occludens 1)      | 7082 | s14157  | CUGUCAUUAUCUUGCCGAAt   | UUCCGUAAGUAUAGACAGct   |
| NM_006289    | TLN1    | talin 1                                          | 7094 | s14187  | GGAUUUUGGAGAUUACCAAt   | UUUGUAUUUCGCAAAUUCcag  |
| NM_006289    | TLN1    | talin 1                                          | 7094 | s14186  | GCAGUUGACAGGACAUUCAt   | UGAAUUCUUCUGUUAACUGct  |
| NM_006289    | TLN1    | talin 1                                          | 7094 | s14185  | GGCUAUAUCUAGUACAGAt    | UCUGUACUGAUAUUAAGCCat  |
| NM_001025234 | TSPAN4  | tetraspanin 4                                    | 7106 | s14216  | GCACUACACGACAGAAUtt    | AUUCUUGCCGUGUAGGCGGaa  |
| NM_001025234 | TSPAN4  | tetraspanin 4                                    | 7106 | s14215  | CGGACAAGAUUAGACAGUAt   | UAACUGUCAUUAUCUUCGctg  |
| NM_001025234 | TSPAN4  | tetraspanin 4                                    | 7106 | s14217  | CCAACUACACUGACUGGUUtt  | AACCAAGUAGUUAUAGUUGag  |
| NM_006292    | TSGL1   | tumor susceptibility gene 101                    | 7251 | s14439  | GAAAAAGGGUACCCAGAAt    | UUUCUGGUGACCCUUUUUcag  |
| NM_006292    | TSGL1   | tumor susceptibility gene 101                    | 7251 | s14440  | CUGUCAAUUGUUAUUCUtt    | AGAGUAAUACAUAUAGCAGtt  |
| NM_006292    | TSGL1   | tumor susceptibility gene 101                    | 7251 | s14441  | GAGACCUAUCUAGUACUGAt   | UCACGUAAGUUAUAGUUCctg  |
| NM_001078    | VCAM1   | vascular cell adhesion molecule 1                | 7412 | s14759  | GGAGUUAAUUUAGUUGGGAAt  | UCCCAUUAUUAUUAUUCctt   |
| NM_001078    | VCAM1   | vascular cell adhesion molecule 1                | 7412 | s14761  | GCAACUUGGUAUUCUAGGAt   | UCCUAGAUUCACAAGUUGctg  |
| NM_001078    | VCAM1   | vascular cell adhesion molecule 1                | 7412 | s14760  | GCAAGGUUCUAGCGGUUAt    | UAACCGCUAAGUUAUAGCAGc  |
| NM_003373    | VCL     | vinculin                                         | 7414 | s14762  | GGUUGGUACUGCUAUAUAAt   | UUUAUUAUGCAGUUAUACCCgc |
| NM_003373    | VCL     | vinculin                                         | 7414 | s14763  | GCUUCAUUAUUAUUCGAAt    | UUUGAAUUUUAUUAUAGAGcag |
| NM_003373    | VCL     | vinculin                                         | 7414 | s14764  | GCUCGUUAUCUUAUAGGAt    | UCCUAAUUAAGUUAUAGCAGc  |
| NM_003379    | EZR     | ezrin                                            | 7430 | s14796  | GGCUUUUCUUGGAGUAGAAAt  | UUUCACUCAAAGGAAGCCaa   |
| NM_003379    | EZR     | ezrin                                            | 7430 | s14795  | CGUGGGUAGUCUAAAGAUAt   | UAUCUUUGAGUUAUCCACGgt  |
| NM_003379    | EZR     | ezrin                                            | 7430 | s14797  | GGAAUCAAUCUUAUUCGAGAt  | UUCUGAAAUAUUAUUAUCCat  |
| NM_004657    | SDPR    | serum deprivation response                       | 8436 | s16008  | ACAUAGCUUAGUUAUUGUtt   | ACAAUAGUCAAGUUGAUGUtg  |
| NM_004657    | SDPR    | serum deprivation response                       | 8436 | s16006  | CGACUUGACUUAUUGGGAAt   | UUCCACAUAUAGUCAAGUCg   |
| NM_004657    | SDPR    | serum deprivation response                       | 8436 | s16007  | CAAAGUUGUUAUUCUAGGAt   | UUACAGAUACGUAUUAUUGct  |
| NM_003644    | GAS7    | growth arrest-specific 7                         | 8522 | s16201  | AGACUUAUGCGAAGAAUUAAt  | UAAGUUUCUUCGUAUUGUctg  |
| NM_003644    | GAS7    | growth arrest-specific 7                         | 8522 | s16202  | GAAUUAUUCGGAAGGGAAt    | UCCUUUCCGGAUGAAUUCct   |
| NM_003644    | GAS7    | growth arrest-specific 7                         | 8522 | s16200  | GGCCAGUCCAAUUGGUUtt    | AAACAUUUGGACUUGGCGctg  |
| NM_003941    | WASL    | Wiskott-Aldrich syndrome-like                    | 8976 | s17134  | GCAGCUUUUUAUUAUAUAt    | UUUGAUUCUAAAGAGUCCct   |
| NM_003941    | WASL    | Wiskott-Aldrich syndrome-like                    | 8976 | s17133  | GGAAUUGUGGGUUAUUAAt    | UUAAUCCACCCACAUAUUCctg |
| NM_003941    | WASL    | Wiskott-Aldrich syndrome-like                    | 8976 | s17132  | CGACAGGUUAUCCAAUUAAt   | UUAGUUUGAAUCCUUGCCGta  |
| NM_024430    | PSTPIP2 | proline-serine-threonine phosphatase             | 9050 | s17253  | CAAAAGAGCUUAACAUAUAt   | UGAAUUGUAAGCUUUUUUgt   |
| NM_024430    | PSTPIP2 | proline-serine-threonine phosphatase             | 9050 | s17254  | CAGUUUGUCUUAUCAGUAAt   | UUACUGAUAGAGCAAAUGtt   |
| NM_024430    | PSTPIP2 | proline-serine-threonine phosphatase             | 9050 | s17252  | CAUCGGCUAUGACAACAUtt   | AAUUGUUGCAUAGCCGAGUgt  |
| NM_003978    | PSTPIP1 | proline-serine-threonine phosphatase             | 9051 | s17257  | AGCUGUCGCUUAACAAGAAt   | UUUUUUAUAGAGCAGUUGgt   |
| NM_003978    | PSTPIP1 | proline-serine-threonine phosphatase             | 9051 | s17255  | GGAGAAGAGUCAGAACAAt    | UUUUUUCUGACUUCUUCc     |
| NM_003978    | PSTPIP1 | proline-serine-threonine phosphatase             | 9051 | s17256  | CUACCAGAAUUAUUCGAUtt   | ACUGUAAUUAUUGUUGGAGgg  |
| NM_012129    | CLDN12  | claudin 12                                       | 9069 | s17298  | CCAUUCUUAACAAGAAGUUtt  | AAACUUUUUUUUAUUAUUGgt  |
| NM_012129    | CLDN12  | claudin 12                                       | 9069 | s17297  | GACACUACUUGGUACUUAAt   | AUGAGUACCAAGUAGUUGctg  |
| NM_012129    | CLDN12  | claudin 12                                       | 9069 | s17299  | CAUUAACAAGAAACGAGAAt   | UUUCUGUUUUUUGUUGAAUGtg |
| NM_021195    | CLDN6   | claudin 6                                        | 9074 | s17309  | GGGAAUGGUUUCGUACCUUtt  | AAAGUUAACAACCAUCCaa    |
| NM_021195    | CLDN6   | claudin 6                                        | 9074 | s17311  | UGAGGAUUAUUAAAAUUAAt   | UGAAUUUUUUUUUAUUCAGt   |
| NM_021195    | CLDN6   | claudin 6                                        | 9074 | s17310  | GAUUGUCUUUUGUUAUCUAt   | UGAGAUGACAAGACAUAUcc   |
| NM_020384    | CLDN2   | claudin 2                                        | 9075 | s17314  | ACUCACCACUGGUGCUGAt    | UCAGGCACCAUGGUGGAGUag  |
| NM_020384    | CLDN2   | claudin 2                                        | 9075 | s17312  | GGAUCCUACGGGACUUCUAt   | UAGAAGUCCGUAAGGAUCCca  |
| NM_020384    | CLDN2   | claudin 2                                        | 9075 | s225076 | GCUCUUUAUCUUGGGCAUUAAt | UAUUGCCCAAGUUAAGAGCct  |
| NM_021101    | CLDN1   | claudin 1                                        | 9076 | s17316  | GACUUCUUGCUGAAUCUGAt   | UCAGAUUCAGCAAGGAGUcaa  |
| NM_021101    | CLDN1   | claudin 1                                        | 9076 | s17317  | ACCUCUUAACCAACCAAt     | UUUGUGUUGGUUAAGAGGtg   |
| NM_021101    | CLDN1   | claudin 1                                        | 9076 | s17315  | CAUUAAGAUUCGUUAAGAAt   | UUUUUUAAGCAUUAUUGGcc   |
| NM_020982    | CLDN9   | claudin 9                                        | 9080 | s194981 | ACCUGGAGUUGUUCAGGGAAt  | UCCUUGACAACUCCAGGUtg   |
| NM_020982    | CLDN9   | claudin 9                                        | 9080 | s194980 | GCAGUCUUGGUCUCCAAAt    | UUUGGACCAACGAGCUGctg   |
| NM_020982    | CLDN9   | claudin 9                                        | 9080 | s194979 | CCUUCGAGUUGGAAUUAAt    | UUUUUUUAACAUCGAGGgtg   |
| NM_004712    | HGS     | hepatocyte growth factor-regulated tyrosine      | 9146 | s17480  | CGUCUUUCCAGAAUUAAt     | UUUGAAUUCUGGAAAGACgtg  |
| NM_004712    | HGS     | hepatocyte growth factor-regulated tyrosine      | 9146 | s17481  | UGGAAUCUGUGGUAAGAAt    | UUUUUUAACCAAGAUUCCatg  |

|              |         |                                                 |       |         |                         |                         |
|--------------|---------|-------------------------------------------------|-------|---------|-------------------------|-------------------------|
| NM_004712    | HGS     | hepatocyte growth factor-regulated tyrosine     | 9146  | s17482  | CACGGUUCUCAACCCGGAAtt   | UUCGGUUGAGAUACCCGUGcg   |
| NM_004240    | TRIP10  | thyroid hormone receptor interactor 10          | 9322  | s17816  | GAACCCAGUGUCCGUGUAtt    | UACACGGACACUGAGGUUcCt   |
| NM_004240    | TRIP10  | thyroid hormone receptor interactor 10          | 9322  | s17815  | GGAGAACGCAGUCGGAAtt     | UUCACGACUGGUUUCGCAa     |
| NM_004240    | TRIP10  | thyroid hormone receptor interactor 10          | 9322  | s17814  | GGAGAAUAGUUAAGCGUAAAtt  | UUUACGCUUACUUAUCCGAg    |
| NM_004869    | VPS4B   | vacuolar protein sorting 4 homolog B (S.        | 9525  | s18274  | CGACAAAUGUGAAUGGAtt     | UCCAUUUCACAUUUGGCGtt    |
| NM_004869    | VPS4B   | vacuolar protein sorting 4 homolog B (S.        | 9525  | s18273  | GCGAAGAUUUGAGAAACGAtt   | UCGUUUUCACAAUCUUCGcCt   |
| NM_004869    | VPS4B   | vacuolar protein sorting 4 homolog B (S.        | 9525  | s18272  | CACGUAGAAUUAAGCAGGAtt   | UCCGCUUUAUUUUCUGUGGc    |
| NM_014751    | MTSS1   | metastasis suppressor 1                         | 9788  | s18916  | CCAGCUUCGGACAACAGUAtt   | UACUGUUGUCCGAAGCUGGga   |
| NM_014751    | MTSS1   | metastasis suppressor 1                         | 9788  | s18917  | CCAUAUCAGCGACAUGAAtt    | UUCAUGUCGCUAGUAGUGGtc   |
| NM_014751    | MTSS1   | metastasis suppressor 1                         | 9788  | s18915  | CCAUCUCGGAAGAUCAAAtt    | UUUAGAUUUCGAGAUUGGtc    |
| NM_001080383 | GJC1    | gap junction protein, gamma 1, 45kDa            | 10052 | s19541  | GGAGGAGAAUCCAUCUUAUtt   | AAUAGAUUGAUUUCUCCUcCta  |
| NM_001080383 | GJC1    | gap junction protein, gamma 1, 45kDa            | 10052 | s19543  | UGUCUGUUUAUGAUGCGUUUtt  | AAACGCAUCAUAAACAGACAtt  |
| NM_001080383 | GJC1    | gap junction protein, gamma 1, 45kDa            | 10052 | s223072 | GAUUCACAACCAUUCACAtt    | UGUGGAAUGGUUGUGAAUCtC   |
| NM_005803    | FLOT1   | flotillin 1                                     | 10211 | s19915  | AGAGAGAUUACGAACUGAAtt   | UUCAGUUCGUAUUCUCUCUgt   |
| NM_005803    | FLOT1   | flotillin 1                                     | 10211 | s19914  | GCAUCAGUGUGUUAGCUAtt    | UAGCUAACCCACUUAUCUGCtt  |
| NM_005803    | FLOT1   | flotillin 1                                     | 10211 | s19913  | GCAGAGAAGUCCCAACUAAtt   | UUAGUUGGGACUUCUCUGCct   |
| NM_017451    | BAIAP2  | BAI1-associated protein 2                       | 10458 | s20464  | AGAAGUACUCGGAACAGGAtt   | UCCUUGUCCGAGUACUUCUGa   |
| NM_017451    | BAIAP2  | BAI1-associated protein 2                       | 10458 | s20465  | BAGAAUCAGCUGGAAGAAtt    | UUUCUCCAGCUGAUUCUGGta   |
| NM_017451    | BAIAP2  | BAI1-associated protein 2                       | 10458 | s20463  | AGACCCGACUGACAGAGGAtt   | UCCUCUGCAGUGCGGUUCgt    |
| NM_006783    | GJB6    | gap junction protein, beta 6, 30kDa             | 10804 | s21231  | AGACAUAGAGGACAUUAAAtt   | UUUAAUGUCCUUAUGUCUtt    |
| NM_006783    | GJB6    | gap junction protein, beta 6, 30kDa             | 10804 | s21232  | GAGAGUAAGCAGAAUGAAAtt   | UUUCAUUCUGCUUAUCUCcCt   |
| NM_006783    | GJB6    | gap junction protein, beta 6, 30kDa             | 10804 | s21233  | GCAGCAUCUUUUCGAAUtt     | AUUCGGAAGAAAGAUUGUGCgt  |
| NM_007229    | PACSIN2 | protein kinase C and casein kinase substrate in | 11252 | s229822 | ACCCAUCCCUCAACCUGAtt    | UCAGGGUUGAGGGAUGGGUct   |
| NM_007229    | PACSIN2 | protein kinase C and casein kinase substrate in | 11252 | s22216  | AGAUGUUCUUUAAGACCAAAAtt | UUUGGUUUUAAGAACAUUCgt   |
| NM_007229    | PACSIN2 | protein kinase C and casein kinase substrate in | 11252 | s22215  | GGAGGUUCAGAAAGCACCUAtt  | UAGGUGCUUCUGAACUCCGta   |
| NM_007241    | SNF8    | SNF8, ESCRT-II complex subunit, homolog (S.     | 11267 | s22248  | GCCAGAUUCGCAAGCAGUtt    | ACUGCUUUAGCAUCUGGGCta   |
| NM_007241    | SNF8    | SNF8, ESCRT-II complex subunit, homolog (S.     | 11267 | s22247  | CAACAGGUUUUGAAGGGAAtt   | UUCCUUCAACACCCUUGUgat   |
| NM_007241    | SNF8    | SNF8, ESCRT-II complex subunit, homolog (S.     | 11267 | s22249  | CGAACUAGGUGUCCAAAUtt    | AAUUUGGACACCUAGUUCGta   |
| NM_015033    | FNBP1   | formin binding protein 1                        | 23048 | s22914  | CCGAUUAUUGAUGCAAAAtt    | UUUCGAUUAUUGAUGCGGct    |
| NM_015033    | FNBP1   | formin binding protein 1                        | 23048 | s22915  | GGAUUUUAGCAGCAGUUUtt    | AAACUCGUCUCAAUUCGgt     |
| NM_015033    | FNBP1   | formin binding protein 1                        | 23048 | s22916  | CAACUUAAAAGAACUCCAtt    | UCCGAGUUCUUUUAAGUUUGgt  |
| NM_015221    | DNMBP   | dynamitin binding protein                       | 23268 | s23437  | GACCAUCCAGUUAUAAAtt     | UUUAGACUUGGGAAUGGUCac   |
| NM_015221    | DNMBP   | dynamitin binding protein                       | 23268 | s23438  | CCGAGUUAUUCAGAGAUAtt    | UACUCUCGAAUUAUCUGGct    |
| NM_015221    | DNMBP   | dynamitin binding protein                       | 23268 | s23439  | CGUUACCCGUGUUGCUAAtt    | UUAGCAACAGCGGGAUACGca   |
| NM_001042758 | SRGAP2  | SLIT-ROBO Rho GTPase activating protein 2       | 23380 | s23693  | AGUACAUUGUGUCCAAAtt     | UCUUGGACACCAUGUAGUUGa   |
| NM_001042758 | SRGAP2  | SLIT-ROBO Rho GTPase activating protein 2       | 23380 | s23692  | GCAUGGAGGAUUAUCUGUAtt   | UCACAGUAAUCCUACUAGCtt   |
| NM_001042758 | SRGAP2  | SLIT-ROBO Rho GTPase activating protein 2       | 23380 | s23691  | CUCUGAUUAUCAGAGAUAtt    | UAUUCUUAUGAUUAUCAGAGgt  |
| NM_012120    | CD2AP   | CD2-associated protein                          | 23607 | s24191  | GCAUUAUUGGUAUAAAGAtt    | UUUUUACCAUUAAGUUGGcc    |
| NM_012120    | CD2AP   | CD2-associated protein                          | 23607 | s24192  | CUAUGAAGGUACUAAUGAAtt   | UUCAUUAUGUACCUUAUAGGc   |
| NM_012120    | CD2AP   | CD2-associated protein                          | 23607 | s24193  | CUGGAACAGUUAACCAAAAtt   | UUUGGGUACACUUAUCCAGa    |
| NM_015480    | PVR13   | poliovirus receptor-related 3                   | 25945 | s24804  | GGAAUUAUGUUUUGAAGAAAtt  | UUCCUACAAACAAUUCACcAt   |
| NM_015480    | PVR13   | poliovirus receptor-related 3                   | 25945 | s24803  | CCAUUGACUUAUUAUUAUtt    | AAUAAUUGAAAGUCAUUGGat   |
| NM_015480    | PVR13   | poliovirus receptor-related 3                   | 25945 | s24802  | GGAAUUAUUGCUUAUAGGAtt   | UCCAUUAGCAGAAUUAUCCgt   |
| NM_015569    | DNM3    | dynamitin 3                                     | 26052 | s25018  | GACUUAUUAUUGCAUUAAtt    | UAUUGGACAUUAUAGGAGCta   |
| NM_015569    | DNM3    | dynamitin 3                                     | 26052 | s25017  | GCAUUAUAGGCAUUAUGAtt    | UGACUAUCGCUCAAUUGCca    |
| NM_015569    | DNM3    | dynamitin 3                                     | 26052 | s25019  | GUGUGGAUCUUGUUAUACAtt   | UUUAUUAACCAUUCACACct    |
| NM_016223    | PACSIN3 | protein kinase C and casein kinase substrate in | 29763 | s26562  | GGAUAGGAGGUGGUCAGUAtt   | AUCUGACCAUCUUAUCCctg    |
| NM_016223    | PACSIN3 | protein kinase C and casein kinase substrate in | 29763 | s26563  | CAAGAAAAGCUAACCCGCAAtt  | UGCGUGGUAGCUUUUUCUUGga  |
| NM_016223    | PACSIN3 | protein kinase C and casein kinase substrate in | 29763 | s26564  | CAUUCAGCCGGAAGAGAAAtt   | UUCUUCUUUCCGGUUAUUGtc   |
| NM_018482    | ASAP1   | ArfGAP with SH3 domain, ankyrin repeat and      | 50807 | s27099  | GGAUUAUCAGUUAUUGAACAAtt | UUUGUUAUUAUUGAUUCCat    |
| NM_018482    | ASAP1   | ArfGAP with SH3 domain, ankyrin repeat and      | 50807 | s27101  | CACAAGUUCUUAUUAAGUtt    | AACUUAUUAAGAAUUAUGUca   |
| NM_018482    | ASAP1   | ArfGAP with SH3 domain, ankyrin repeat and      | 50807 | s27100  | GCACCCGCUUUGUUAAGUtt    | AAUUCGACAAACGGGUGCca    |
| NM_016946    | F11R    | F11 receptor                                    | 50848 | s27150  | GCCUAGUUGCCGGAUGGAAtt   | UUCAUUCGCGGACUAGGgtg    |
| NM_016946    | F11R    | F11 receptor                                    | 50848 | s27151  | CCAUCAAAGCCUACAGUAtt    | UAACUGUAGGCUUGGAUGGag   |
| NM_016946    | F11R    | F11 receptor                                    | 50848 | s27152  | GGAUAGUAGUCCUACGAAtt    | UUCGUAGGCAUCACUUAUCCa   |
| NM_016208    | VPS28   | vacuolar protein sorting 28 homolog (S.         | 51160 | s27577  | AAUCAGUCUUAUUGAAGAAAtt  | UUCGUCAUUAGGCAUUAUGtc   |
| NM_016208    | VPS28   | vacuolar protein sorting 28 homolog (S.         | 51160 | s27578  | GGAAACAAGCCGAGCUGUAtt   | UACAGCUCGCGGUUUGUCCta   |
| NM_016208    | VPS28   | vacuolar protein sorting 28 homolog (S.         | 51160 | s27579  | GAAUGUAGUUAUUAACAAGAtt  | UCUUUUAACAUCUACUUCct    |
| NM_016580    | PCDH12  | protocadherin 12                                | 51294 | s27870  | CAUACAUUUGUUAUACAAtt    | UUGGUUAGCAUUAUUGGtg     |
| NM_016580    | PCDH12  | protocadherin 12                                | 51294 | s27869  | CCAUCUACCGUGACAUGUtt    | ACAUUGUACGGAUUAUGGtg    |
| NM_016580    | PCDH12  | protocadherin 12                                | 51294 | s27871  | CUGGUACAGUAGUCCGGAAtt   | UUUCCGGAUCAGUUAUCCAGct  |
| NM_001005753 | VPS24   | vacuolar protein sorting 24 homolog (S.         | 51652 | s28475  | GCUGGGAUCAUAGAGGAGAtt   | UUCUCUUAUUAUUAUCCGat    |
| NM_001005753 | VPS24   | vacuolar protein sorting 24 homolog (S.         | 51652 | s28474  | UGAGGGAGUUAUUGCAAGAtt   | UCUUUGGACAACUCCUUCAtg   |
| NM_001005753 | VPS24   | vacuolar protein sorting 24 homolog (S.         | 51652 | s28473  | GCAUUGGACGAUACAGGAGAtt  | UUCUUCGUAUGUCCUAGUcCt   |
| NM_017737    | FNBP1L  | formin binding protein 1-like                   | 54874 | s29645  | GGCAACACAGAUUAUAGAAtt   | UUCAUUAUCUUGUUGGcCtt    |
| NM_017737    | FNBP1L  | formin binding protein 1-like                   | 54874 | s29646  | GGACUAUCAGUUAUUAUAtt    | UUGGAUUCAGUUAUUGCca     |
| NM_017737    | FNBP1L  | formin binding protein 1-like                   | 54874 | s29644  | GGACGACGAAAGGACUUAUtt   | AAUAGUCCUUCGUUCCUCCat   |
| NM_020145    | SH3GLB2 | SH3-domain GRB2-like endophilin B2              | 56904 | s32358  | AGACAGAUUUAUAGCCGCAAtt  | UGCCGGUCAAACUUCUGUUGg   |
| NM_020145    | SH3GLB2 | SH3-domain GRB2-like endophilin B2              | 56904 | s32357  | CGACGGUGCCGACUUAUAtt    | UGAAAGUCAGGCACCCUGctg   |
| NM_020145    | SH3GLB2 | SH3-domain GRB2-like endophilin B2              | 56904 | s32359  | GGAGACACGUAUUAAGGUtt    | ACCUUGAUUCAGUUCUUCcCa   |
| NM_020762    | SRGAP1  | SLIT-ROBO Rho GTPase activating protein 1       | 57522 | s33218  | GCACUUAAGGAUUAACAAtt    | UGUUUUAUGAUCCUUAUGCctt  |
| NM_020762    | SRGAP1  | SLIT-ROBO Rho GTPase activating protein 1       | 57522 | s33219  | GGUCGUGUUAUUAUGUAtt     | AUCACUUAUUAAGGACCCctg   |
| NM_020762    | SRGAP1  | SLIT-ROBO Rho GTPase activating protein 1       | 57522 | s33217  | GGAUUAUGGUAUUAUUAUtt    | AAACGUAUUAUUAUUAUCCgtg  |
| NM_021219    | JAM2    | junctional adhesion molecule 2                  | 58494 | s33856  | GCUACGAUUGCAAGACAAtt    | UUUGGUUAUUAUUAUUAUCCtc  |
| NM_021219    | JAM2    | junctional adhesion molecule 2                  | 58494 | s33857  | GCAUCCGUUUGCUAGAAAAtt   | UUUUUUAUUAUUAUUAUCCca   |
| NM_021219    | JAM2    | junctional adhesion molecule 2                  | 58494 | s33855  | CAGUCACUCGGAAGUUAUtt    | AAACGUAUUAUUAUUAUCCgta  |
| NM_015059    | TLN2    | talins 2                                        | 83660 | s38090  | GCUGUUGUUGGUAUUCGUAtt   | UAGCGAAUCACAAUGCAGCtt   |
| NM_015059    | TLN2    | talins 2                                        | 83660 | s38088  | GGAGUAGAUAAAACGAAAtt    | UUUCGUUUUUAUUAUUAUCCctt |
| NM_015059    | TLN2    | talins 2                                        | 83660 | s38089  | CGACGAAUCCAAACGAAAtt    | UUCGUGUUUUAUUAUUAUCCgac |
| NM_032801    | JAM3    | junctional adhesion molecule 3                  | 83700 | s38127  | AGUUAACUGUGCAAGUGAAtt   | UUCAUUGCAGAUUAUUAUCCg   |
| NM_032801    | JAM3    | junctional adhesion molecule 3                  | 83700 | s38129  | GGAGUUAUUAUUAUUAUCCAtt  | UGCGGAUUGUUAUUAUUAUCCct |

|              |         |                                            |        |         |                        |                         |
|--------------|---------|--------------------------------------------|--------|---------|------------------------|-------------------------|
| NM_032801    | JAM3    | junctional adhesion molecule 3             | 83700  | s38128  | GCUACUUCAUCAACAAUAAtt  | UUUUUGUUGAUGAAGUAGCca   |
| NM_138383    | MTSS1L  | metastasis suppressor 1-like               | 92154  | s40868  | CGGCAUGAGAUCAAAAAGAtt  | UCUUUUUGAUCUCAUGCCGgg   |
| NM_138383    | MTSS1L  | metastasis suppressor 1-like               | 92154  | s40867  | GCCCGAGUUUGACAAGUCAAtt | UGACUUUGUCAAAACUCGGGcgg |
| NM_138383    | MTSS1L  | metastasis suppressor 1-like               | 92154  | s40869  | CAAACAUACUCACCCAGUUAtt | AACUGGGUGAGUAUUGUUUGgg  |
| NM_001039724 | NOSTRIN | nitric oxide synthase trafficker           | 115677 | s41845  | GGAGCAUACUCAUAGCUAUAtt | AUAGCUAUGAGUAUAGCUcct   |
| NM_001039724 | NOSTRIN | nitric oxide synthase trafficker           | 115677 | s41847  | GGCGGGUUUUUUAACAGAtt   | UCUGGUAGAAUAACCCGCcat   |
| NM_001039724 | NOSTRIN | nitric oxide synthase trafficker           | 115677 | s41846  | CUGAGUUCCUGUUAAACGAtt  | UCCGUUAACAGGAACUCAGat   |
| NM_152219    | GJD3    | gap junction protein, delta 3, 31.9kDa     | 125111 | s42859  | GCAUCAUCCGAUGGAAUAAtt  | UAUUUCCAUCGGAUGAUGCtg   |
| NM_152219    | GJD3    | gap junction protein, delta 3, 31.9kDa     | 125111 | s42857  | CUGCAACCGUGCACAGAAAtt  | UUCGUGUGCAGGUUGCAGcg    |
| NM_152219    | GJD3    | gap junction protein, delta 3, 31.9kDa     | 125111 | s42858  | CGGUGCUGUUCGUCGUCUAtt  | UAGACGACGAACAGCACCGgg   |
| NM_153212    | GJB4    | gap junction protein, beta 4, 30.3kDa      | 127534 | s43186  | CAGUAUAUGUCAAAACCUAtt  | AGAGGUUUAGACUAUACUGtt   |
| NM_153212    | GJB4    | gap junction protein, beta 4, 30.3kDa      | 127534 | s43185  | ACGACAACCGAGCAAGAAtt   | UUUUUGUCACAGGUUGUCGUac  |
| NM_153212    | GJB4    | gap junction protein, beta 4, 30.3kDa      | 127534 | s43184  | GCCUCUACAAGGAUUUAUGAtt | UCAUAAUCCUUGUAGAGGcgg   |
| NM_177986    | DSG4    | desmoglein 4                               | 147409 | s44997  | GCUCAGUCUUUUCGCAAAtt   | UUUGCGAAAAGACUGGAGCgt   |
| NM_177986    | DSG4    | desmoglein 4                               | 147409 | s44999  | CGGCAAUCCUUAACGGCUAAtt | UUAGCCGUAAGGAUUGCCGag   |
| NM_177986    | DSG4    | desmoglein 4                               | 147409 | s44998  | GUUCGGAAUCGUAUCGAUAtt  | AAUCGUUAUCAGUUCCGAACtt  |
| NM_012232    | PTRF    | polymerase I and transcript release factor | 284119 | s49506  | GUCGGGAUCUCAGAGGAAAtt  | UUUCCUCUGAGAUCCGACtt    |
| NM_012232    | PTRF    | polymerase I and transcript release factor | 284119 | s49507  | CAUCUCUACUAAGCGAAAAtt  | UUUUUGCUUAGUAGAGAUggg   |
| NM_012232    | PTRF    | polymerase I and transcript release factor | 284119 | s49508  | CGAGCAAUACGGUGAGCAAtt  | UUGCUCACCGUAUUGUCGtg    |
|              | OCLN    |                                            |        | s446558 | AGACUAUGAUAGACAGAAAtt  | UUUCUGUCUAUUAUAGUCUcc   |
|              | OCLN    |                                            |        | s446559 | AGAACUUAGUAGAGAAUAtt   | AUUGAUCUCAAGAUCUgga     |
|              | OCLN    |                                            |        | s446560 | AGAAUUGGAGACUAUAGAtt   | UCUAUAGUCAACAAUUCtt     |
